# Supplementary material for: Efficient and stereoselective synthesis of monomeric and bimetallic pincer complexes containing Pd-bonded stereogenic carbons
Source: Royal Society of Chemistry journal article supplement (doi:10.1039/c6ra16721g), 2016-01-01
Supplement: c6ra16721g1.pdf [file c6ra16721g1.pdf]

**Efficient and Stereo-selective Synthesis of Monomeric and Bi-metallic Pincer  
Complexes Containing Pd-bonded Stereogenic Carbons**

**Wee Shan Tay, Xiang-Yuan Yang, Yongxin Li, Sumod A. Pullarkat, Pak-Hing Leung\***

Division of Chemistry & Biological Chemistry, School of Physical and Mathematical Sciences, Nanyang Technological University, Singapore 637371, Singapore Fax: (+65) 6791 1961; e-mail: pakhing@ntu.edu.sg.

**Supporting Information**

|                                                                                 |               |
|---------------------------------------------------------------------------------|---------------|
| <b><u>Table of Contents</u></b>                                                 | <b>S1</b>     |
| <b>General Information</b>                                                      | <b>S2</b>     |
| <b>Experimental Section</b>                                                     | <b>S2-4</b>   |
| <b>Reference</b>                                                                | <b>S4</b>     |
| <b>NMR Spectra</b>                                                              | <b>S5-31</b>  |
| <b>Determination of <i>ee</i>'s and <i>de</i>'s for bisphosphines 12 and 15</b> | <b>S32-33</b> |
| <b>Molecular Structures of NC(sp<sup>3</sup>)S Pincer Complexes 4b and 9b</b>   | <b>S34</b>    |
| <b>HPLC Spectrum</b>                                                            | <b>S35</b>    |
| <b>Crystallographic Data</b>                                                    | <b>S36-40</b> |

---

## General Information

All reactions were carried out under a positive pressure of nitrogen using standard Schlenk techniques. NMR spectra were recorded on Bruker AV 300, AV 400 and AV 500 spectrometers. Chemical shifts were reported in ppm and referenced to an internal SiMe<sub>4</sub> standard (0 ppm) for <sup>1</sup>H NMR, chloroform-d (77.23 ppm) for <sup>13</sup>C NMR, and an external 85% H<sub>3</sub>PO<sub>4</sub> for <sup>31</sup>P{<sup>1</sup>H} NMR. DCM, DCE, DEE, toluene, acetone, acetonitrile and MeOH were purchased from their respective companies and used as supplied. THF was distilled prior to use. Solvents were degassed when necessary. A Low Temp Pairstirrer PSL-1400 was used for controlling low temperature reactions. Column chromatography was carried out with Silica gel 60 (Merck). Melting points were measured using SRS Optimelt Automated Point System SRS MPA100. Optical rotation were measured with JASCO P-1030 Polarimeter in the specified solvent in a 0.1 dm cell at 22.0°C.

The palladacycle (S)-**2**<sup>1</sup>, enones **1**,<sup>2</sup> **5**<sup>3</sup> and **11**,<sup>4</sup> PC(*sp*<sup>2</sup>)P PdCl complex (*R,R*)-**7**<sup>3</sup> were prepared according to literature methods. PdCl<sub>2</sub>(NCMe)<sub>2</sub> was prepared by adding PdCl<sub>2</sub> portionwise to boiling acetonitrile under vigorous stirring for 30 mins. The yellow suspension was filtered and the yellow residue (PdCl<sub>2</sub>(NCMe)<sub>2</sub>) washed with acetonitrile and dried. All other reactants and reagents were used as supplied.

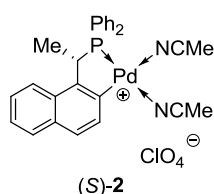

**Figure s1.** Palladacycle catalyst involved in this work.

**Caution!** Perchlorate salts of metal complexes are potentially explosive compounds and should be handled with care.

## Synthesis of dienone **14**<sup>5</sup>

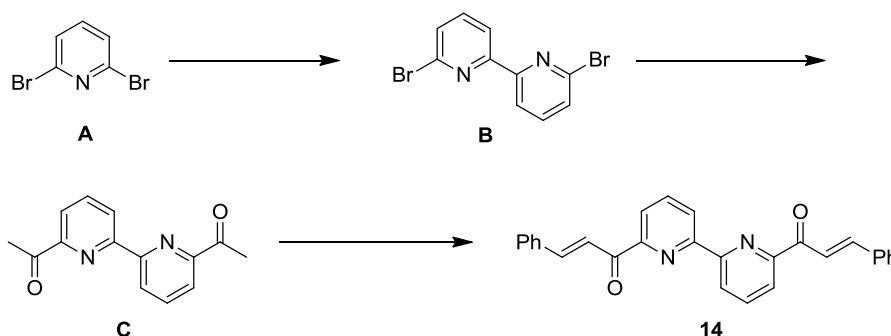

**Scheme s1.** Synthesis of dienone **14**.

A solution of 2,6-dibromopyridine **A** (10.0 g, 42.2 mmol, 1.0 equiv.) in DEE (150 mL) at 0°C was treated with 2.5 M *n*-BuLi in DEE (16.9 mL, 42.3 mmol, 1.0 equiv.) and stirred for 1 h. Anhydrous CuCl<sub>2</sub> (2.84 g, 21.1 mmol, 0.5 equiv.) was added portionwise and the temperature maintained at -50°C for 30 min. The brown suspension was bubbled with O<sub>2</sub> until the mixture

turned green. The reaction mixture was allowed to warm up to room temperature, hydrolyzed with 6 N HCl (15 mL), solvent removed under reduced pressure and filtered. The residue was washed with dilute HCl (to remove traces of Cu), dissolved in EA, wash with water (2 X 50 mL), dry over MgSO<sub>4</sub>, filtered and solvent removed. The crude product was recrystallized from benzene to afford white needles of **B**. Yield: 8.75 g, 27.9 mmol, 66%. Mp: 225-226°C. <sup>1</sup>H NMR (CDCl<sub>3</sub>, 400 MHz): δ 8.38 (d, 2H, <sup>3</sup>J = 7.7 Hz, BrCNCCH), 7.67 (t, 2H, <sup>3</sup>J = 7.8 Hz, BrCCHCH), 7.50 (d, 2H, <sup>3</sup>J = 7.8 Hz, BrCCH). <sup>13</sup>C NMR (CDCl<sub>3</sub>, 100 MHz): δ 155.8 (2C, BrCNC), 141.8 (2C, BrC), 139.5 (2C, BrCCHCH), 128.8 (2C, BrCCH), 120.4 (2C, BrCNCCH). Anal. Calcd for C<sub>10</sub>H<sub>6</sub>Br<sub>2</sub>N<sub>2</sub>: C, 38.25; H, 1.93; N, 8.92. Found: C, 38.58; H, 2.15; N, 9.19%. HRMS (+ESI) m/z: (M + H)<sup>+</sup> calcd for C<sub>10</sub>H<sub>7</sub>Br<sub>2</sub>N<sub>2</sub>, 312.8976; found, 312.8978.

To a solution of 6,6'-dibromo-2,2'-bipyridine **B** (3.50 g, 11.1 mmol, 1.0 equiv.) in THF (250 mL) at -80°C was added 2.5 M *n*-BuLi in DEE (9.36 mL, 23.4 mmol, 2.1 equiv.) and stirred for 1 h. *N,N*-dimethylacetamide (2.28 mL, 24.5 mmol, 2.2 equiv.) in DEE (50 mL) was added dropwise and the purple solution stirred for 2h. The mixture was raised to -10°C, hydrolyzed with 6 N HCl (20 mL), concentrated under reduced pressure and neutralized with dilute aq. NaOH. The organic layer was extracted with DCM (3 X 50 mL), washed with H<sub>2</sub>O (2 X 50 mL), dried over MgSO<sub>4</sub>, filtered and the solvent evaporated. The crude product was recrystallized from EtOH twice to afford pure **C**. Yield: 1.87 g, 7.80 mmol, 70%. Mp: 175-177°C. <sup>1</sup>H NMR (CDCl<sub>3</sub>, 300 MHz): δ 8.72 (d, 2H, <sup>3</sup>J = 7.6 Hz, O=CCNCCH), 8.09 (d, 2H, <sup>3</sup>J = 7.6 Hz, O=CCCH), 8.00 (t, 2H, <sup>3</sup>J = 7.7 Hz, O=CCCHCH), 2.84 (s, 6H, CH<sub>3</sub>). <sup>13</sup>C NMR (CDCl<sub>3</sub>, 100 MHz): δ 200.2 (2C, C=O), 154.8 (2C, O=CCNC), 153.2 (2C, O=CCN), 138.1 (2C, O=CCCHC), 124.5 (2C, O=CCNCCH), 122.0 (2C, O=CCCH<sub>2</sub>), 25.9 (2C, CH<sub>3</sub>). Anal. Calcd for C<sub>14</sub>H<sub>12</sub>N<sub>2</sub>O<sub>2</sub>: C, 69.99; H, 5.03; N, 11.66. Found: C, 69.84; H, 5.40; N, 11.30%. HRMS (+ESI) m/z: (M + H)<sup>+</sup> calcd for C<sub>14</sub>H<sub>13</sub>N<sub>2</sub>O<sub>2</sub>, 241.0977; found, 241.0976.

A mixture of 1,1'-([2,2'-bipyridine]-6,6'-diyl)diethanone **C** (1.00 g, 4.16 mmol, 1.0 equiv.), benzaldehyde (0.93 mL, 9.16 mmol, 2.2 equiv.) and KOH (10 % w/v in MeOH, 20 mL) was refluxed overnight. The pure dienone **14** was crystallized from the reaction mixture. Yield: 1.30 g, 3.12 mmol, 75%. Mp: 251-252°C. <sup>1</sup>H NMR (CDCl<sub>3</sub>, 400 MHz): δ 8.82 (d, 2H, <sup>3</sup>J = 7.7 Hz, O=CCNCCH), 8.46 (d, 2H, <sup>3</sup>J = 16.0 Hz, PhCH=CH), 8.29 (d, 2H, <sup>3</sup>J = 7.6 Hz, O=CCCH), 8.12 (t, 2H, <sup>3</sup>J = 7.8 Hz, O=CCCHCH), 8.02 (d, 2H, <sup>3</sup>J = 16.1 Hz, PhCH=CH), 7.78-7.77 (m, 4H, Ar), 7.48-7.46 (m, 6H, Ar). <sup>13</sup>C NMR (CDCl<sub>3</sub>, 75 MHz): δ 189.5 (2C, C=O), 154.9 (2C, O=CCNC), 154.0 (2C, O=CCN), 145.1 (2C, PhCH=CH), 138.4 (2C, O=CCCHCH), 135.5 (2C, Ph), 130.9 (2C, O=CCNCCH), 129.2 (4C, Ph), 129.0 (4C, Ph), 124.5 (2C, Ph), 123.5 (2C, PhCH=CH), 121.1 (s, 2C, O=CCCH). Anal. Calcd for C<sub>28</sub>H<sub>20</sub>N<sub>2</sub>O<sub>2</sub>: C, 80.75; H, 4.84; N, 6.73. Found: C, 81.01; H, 5.09; N, 6.50%. HRMS (+ESI) m/z: (M + H)<sup>+</sup> calcd for C<sub>28</sub>H<sub>21</sub>N<sub>2</sub>O<sub>2</sub>, 417.1603; found, 417.1604.

### General procedure for the asymmetric hydrophosphination of compound **17**.

A Schlenk tube was charged with HPPPh<sub>2</sub> (12.1 mg, 65.0 μmol, 1.5 equiv), NCE (E = O, S) complex (2.2 μmol, 5 mol% for mono-metallic complex; 1.1 μmol, 2.5 mol% for bi-metallic complex), KOAc (0.86 μg, 8.7 μmol, 20 mol%), malonate **17** (10.7 μL, 43.3 μmol, 1.0

equiv.), solvent (3 mL) and stirred at RT for 24h. Subsequently, aq. H<sub>2</sub>O<sub>2</sub> (31% w/w, 0.1 mL) was introduced to the mixture. The volatiles were removed and the crude product loaded directly onto silica gel column (1 *n*-hexane : 2 EA) to afford pure white solid(s) of **18a** (1,4-adduct) and/or **18b** (1,6-adduct). The data obtained for both products are consistent with literature.<sup>6</sup>

## **Reference**

- [1] Huang, Y.; Chew, R. J.; Li, Y.; Pullarkat, S. A.; Leung, P. H. *Org. Lett.* **2011**, *13*, 5862-5865.
- [2] Singh P. K.; Singh, V. K. *Org. Lett.* **2008**, *10*, 4121-4124.
- [3] Yang X.-Y.; Tay, W. S.; Li, Y.; Pullarkat, S. A.; Leung, P.-H. *Organometallics* **2015**, *34*, 1582-1588.
- [4] Higuchi, M.; Otsuka, Y.; Shomura, R.; Kurth, D. G. *Thin Solid Films* **2008**, *516*, 2416-2420.
- [5] Chotalia, R.; Constable, E. C.; Neuburger, M.; Smith, D. R.; Zehnder, M. *J. Chem. Soc., Dalton Trans.* **1996**, 4207-4216.
- [6] Yang, X.-Y.; Gan, J. H.; Li, Y.; Pullarkat, S. A.; Leung, P.-H. *Dalton Trans.* **2015**, *44*, 1258-1263.

## NMR Spectra

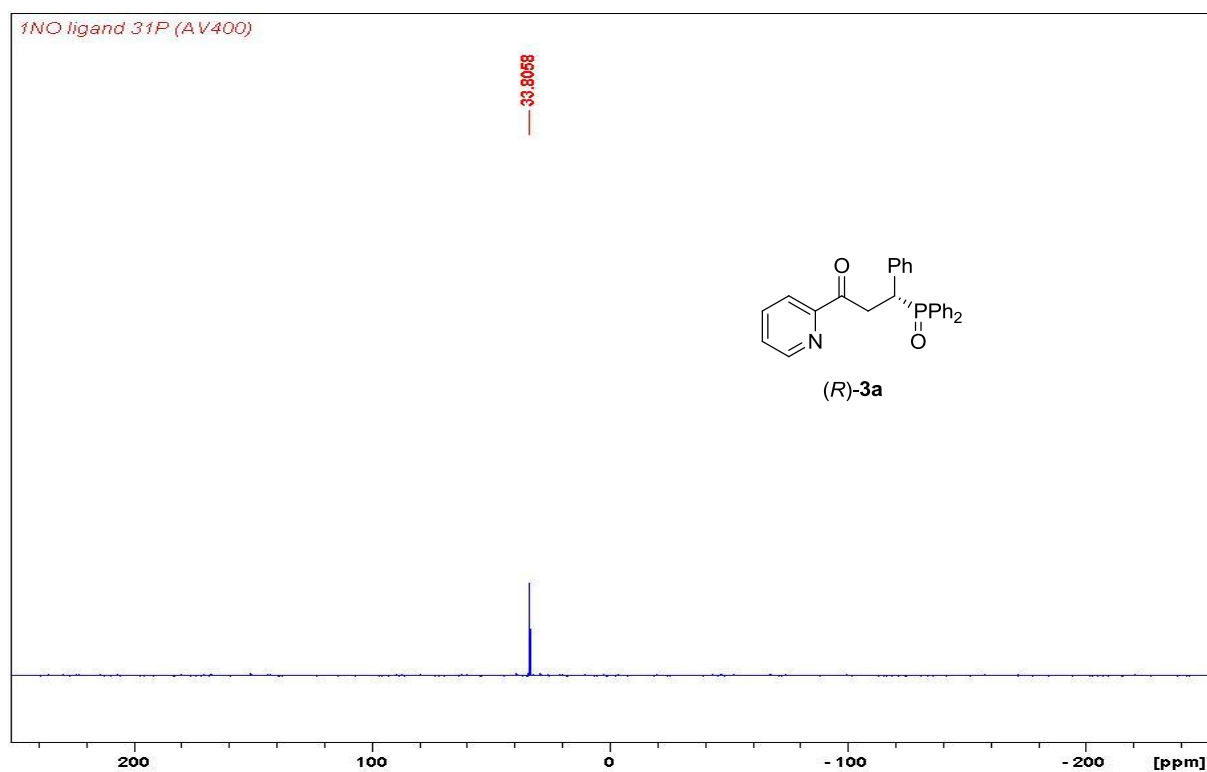

Figure s2.  $^{31}\text{P}\{^1\text{H}\}$  NMR spectrum of compound (R)-3a.

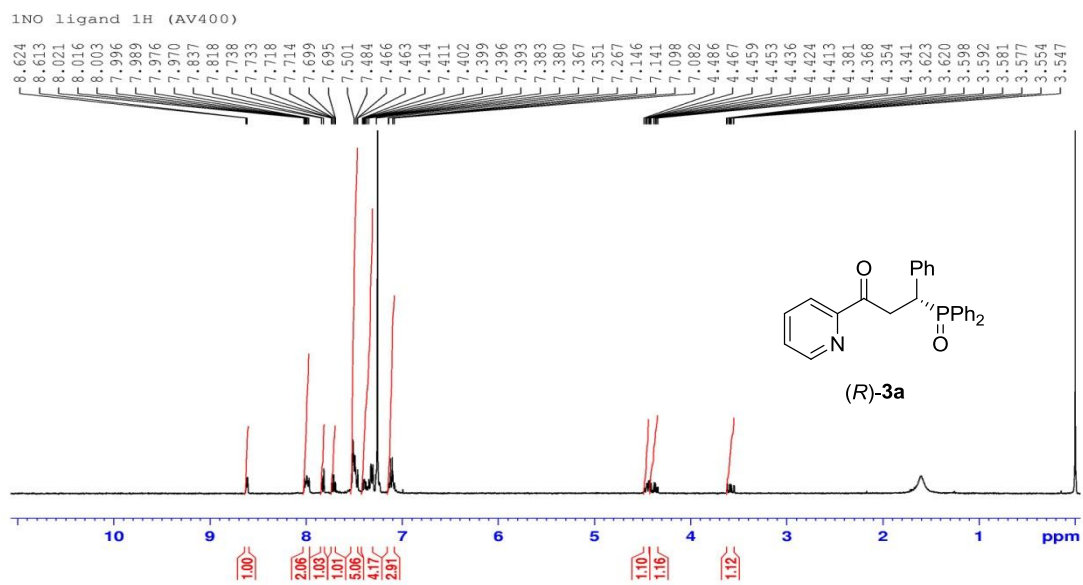

Figure s3.  $^1\text{H}$  NMR spectrum of compound (R)-3a.

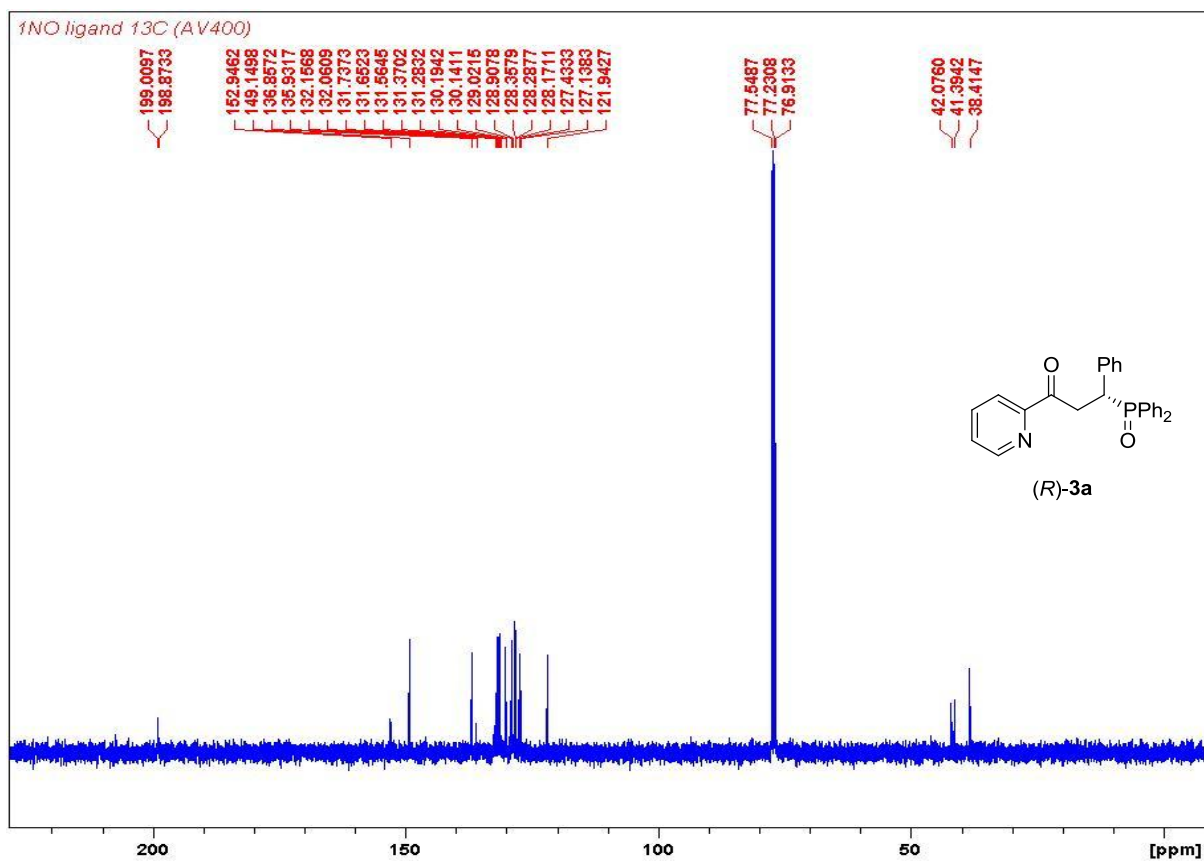

**Figure s4.**  $^{13}\text{C}$  NMR spectrum of compound **(R)-3a**.

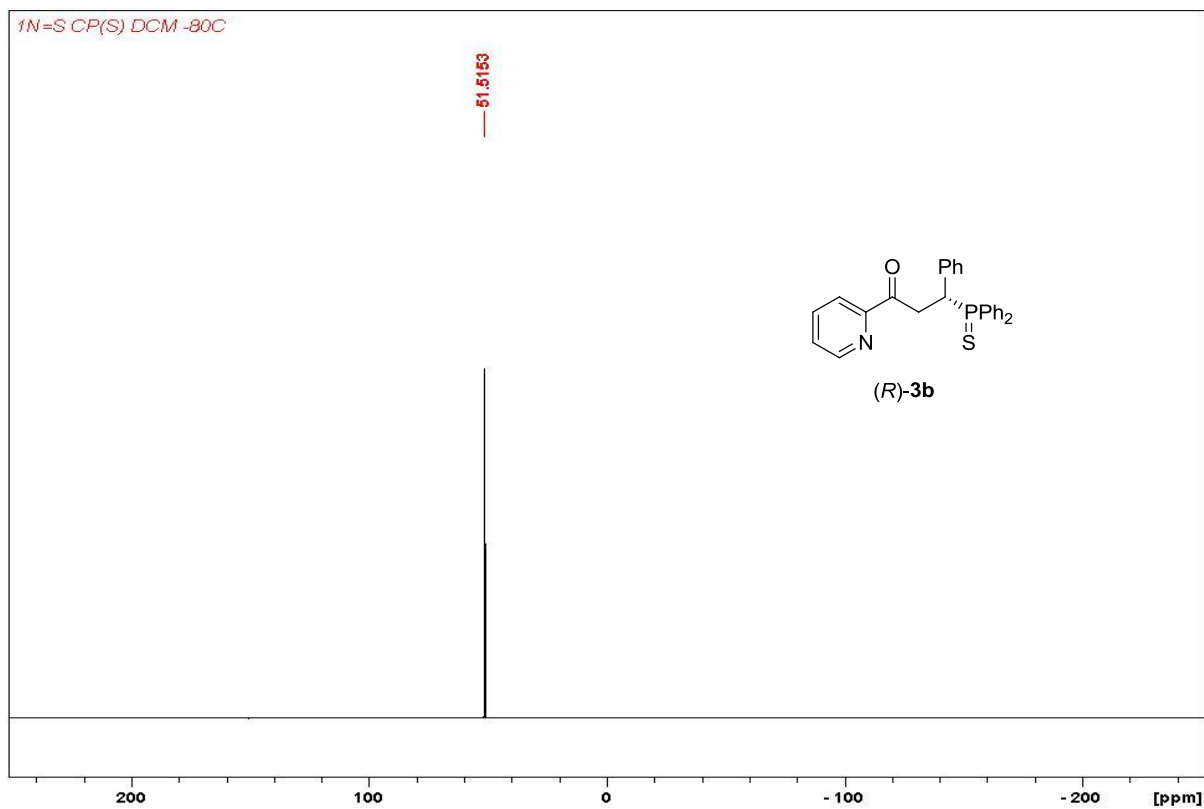

**Figure s5.**  $^{31}\text{P}\{^1\text{H}\}$  NMR spectrum of compound **(R)-3b**.

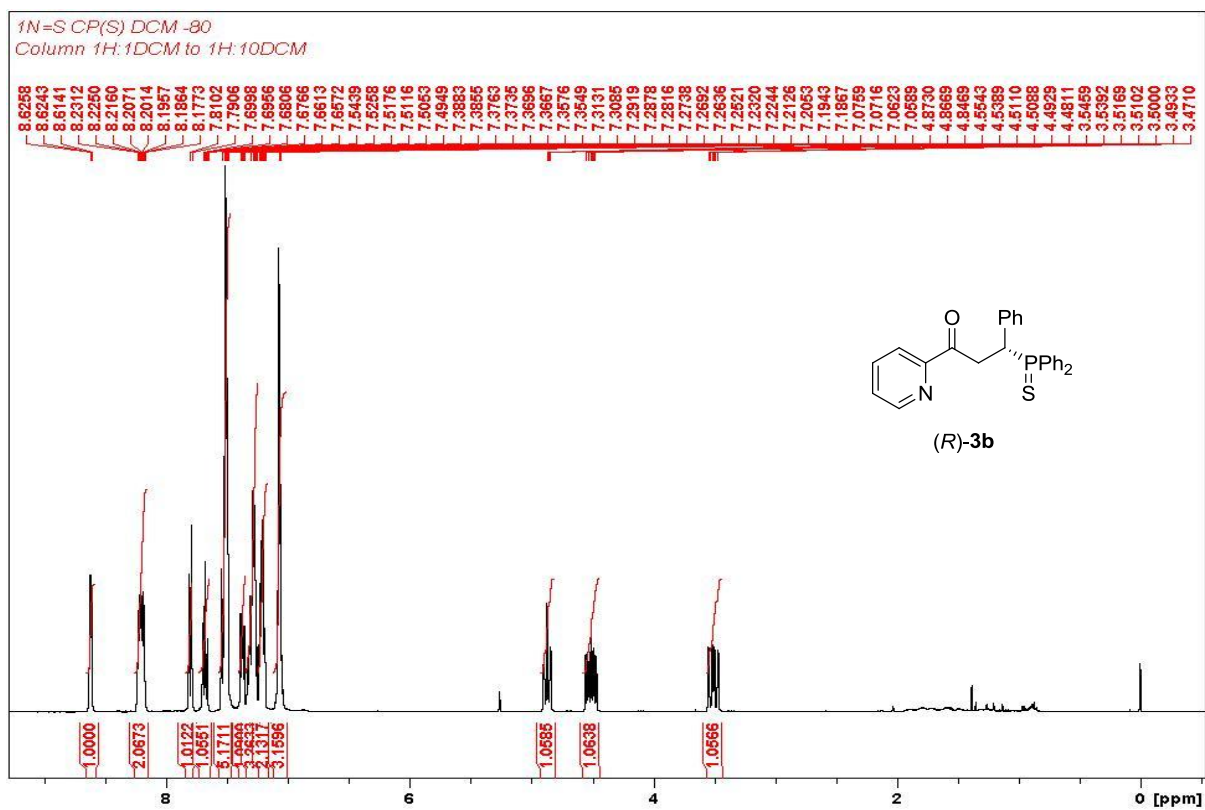

Figure s6.  $^1\text{H}$  NMR spectrum of compound (R)-3b.

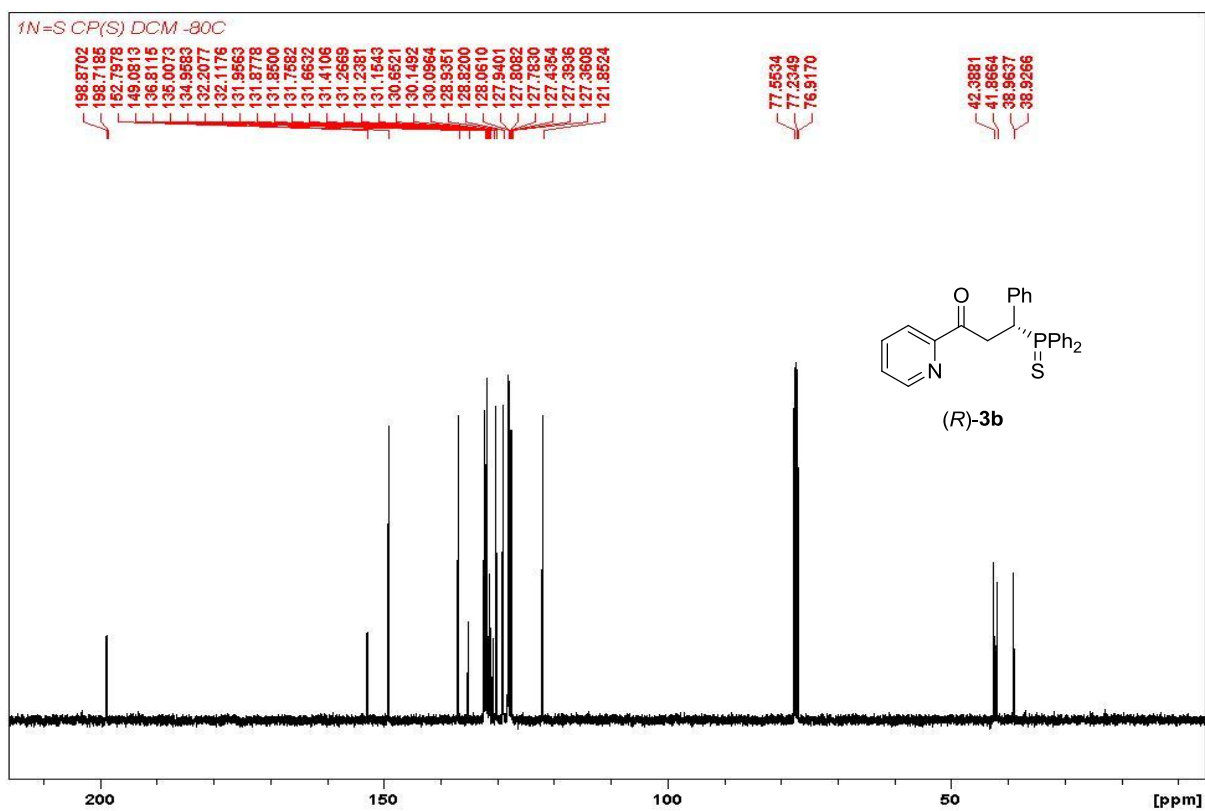

Figure s7.  $^{13}\text{C}$  NMR spectrum of compound (R)-3b.

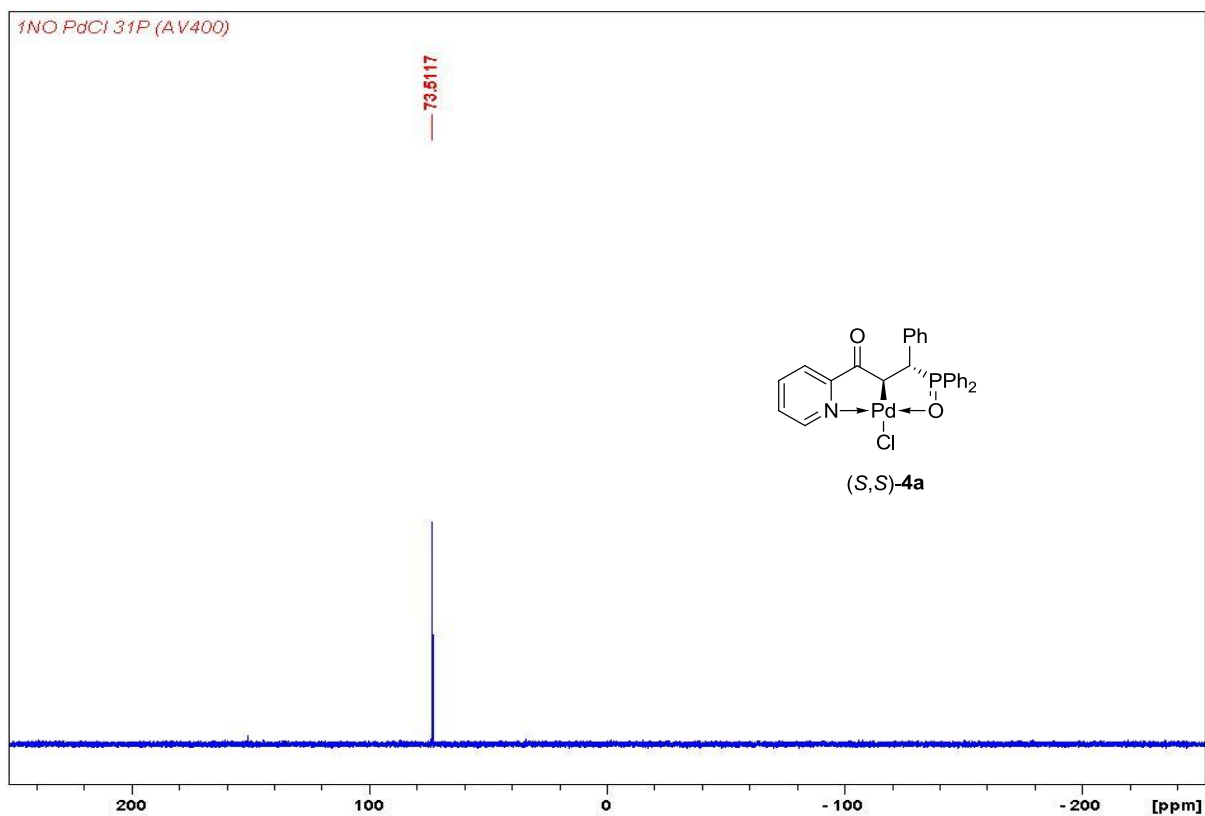

Figure s8.  $^{31}\text{P}\{^1\text{H}\}$  NMR spectrum of compound (S,S)-4a.

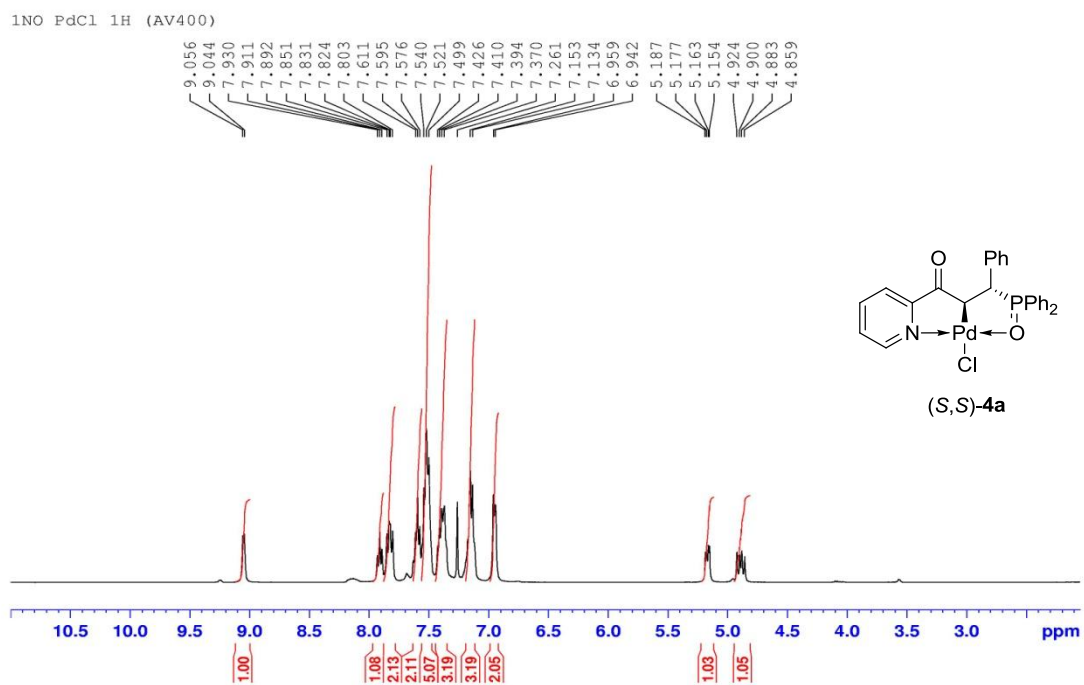

Figure s9.  $^1\text{H}$  NMR spectrum of compound (S,S)-4a.



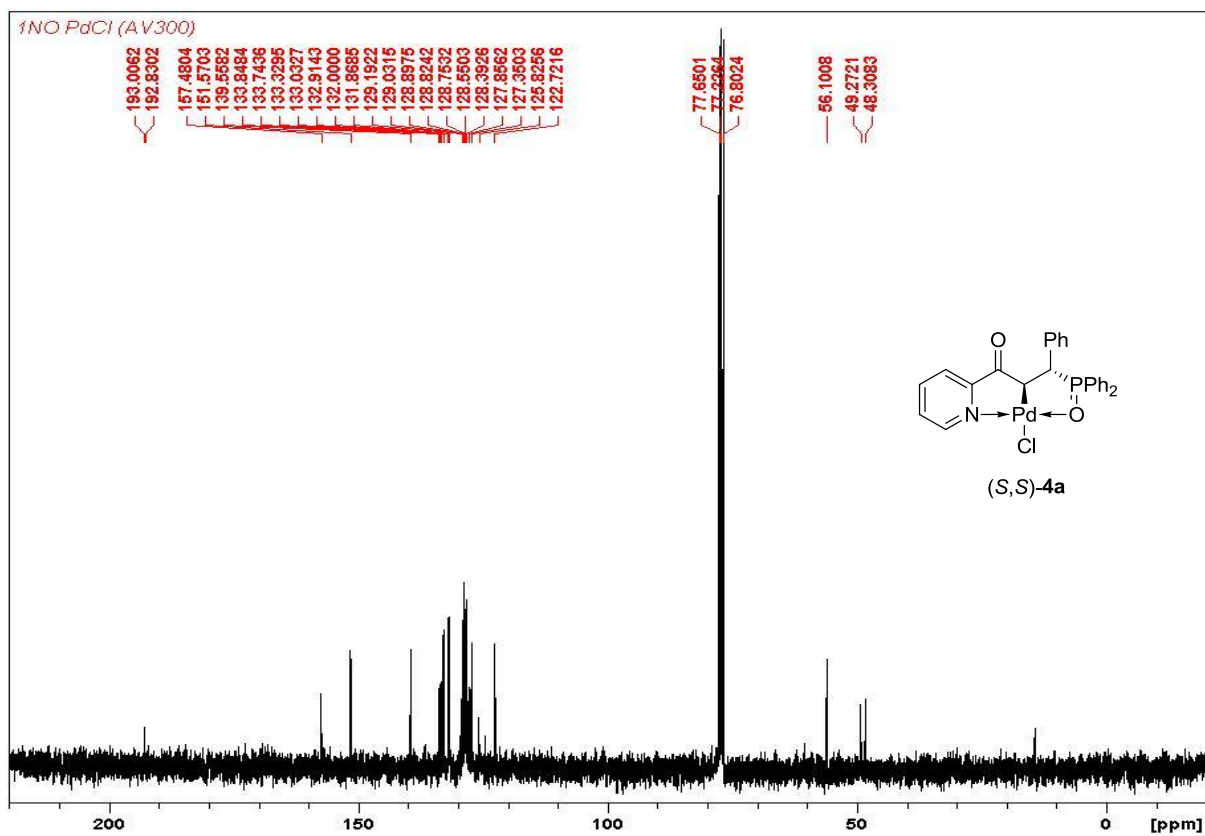

Figure s10.  $^{13}\text{C}$  NMR spectrum of compound (S,S)-4a.

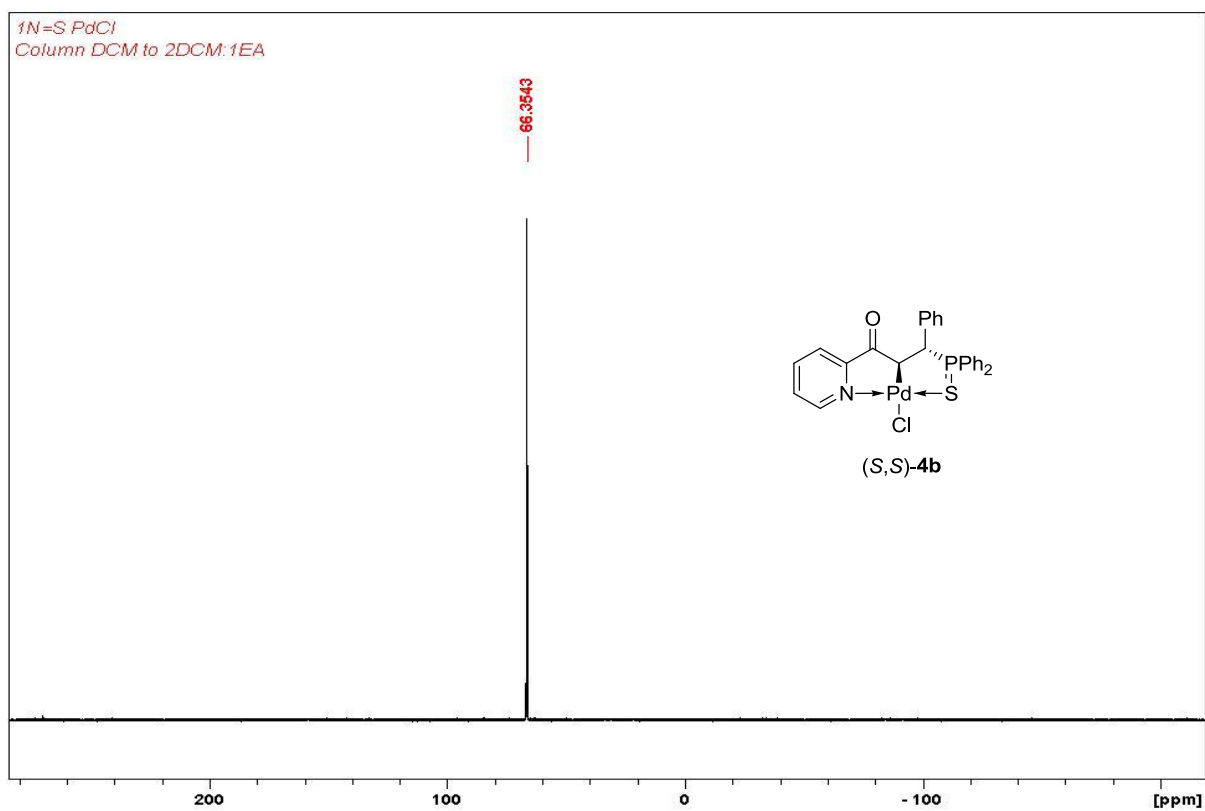

Figure s11.  $^{31}\text{P}\{^1\text{H}\}$  NMR spectrum of compound (S,S)-4b.

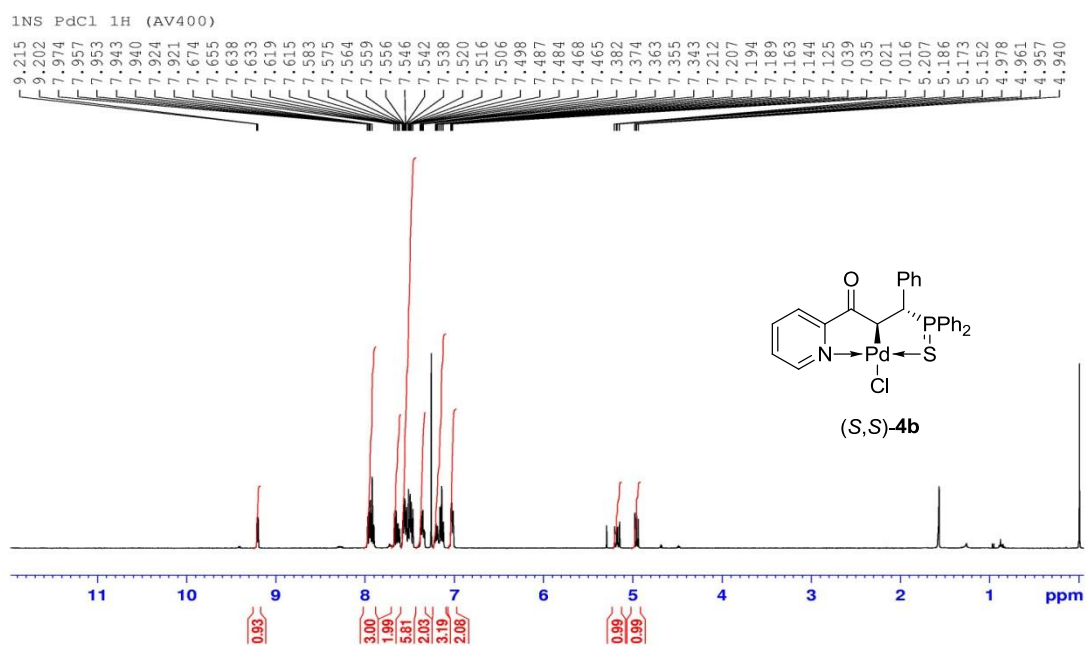

Figure s12. <sup>1</sup>H NMR spectrum of compound (*S,S*)-**4b**.

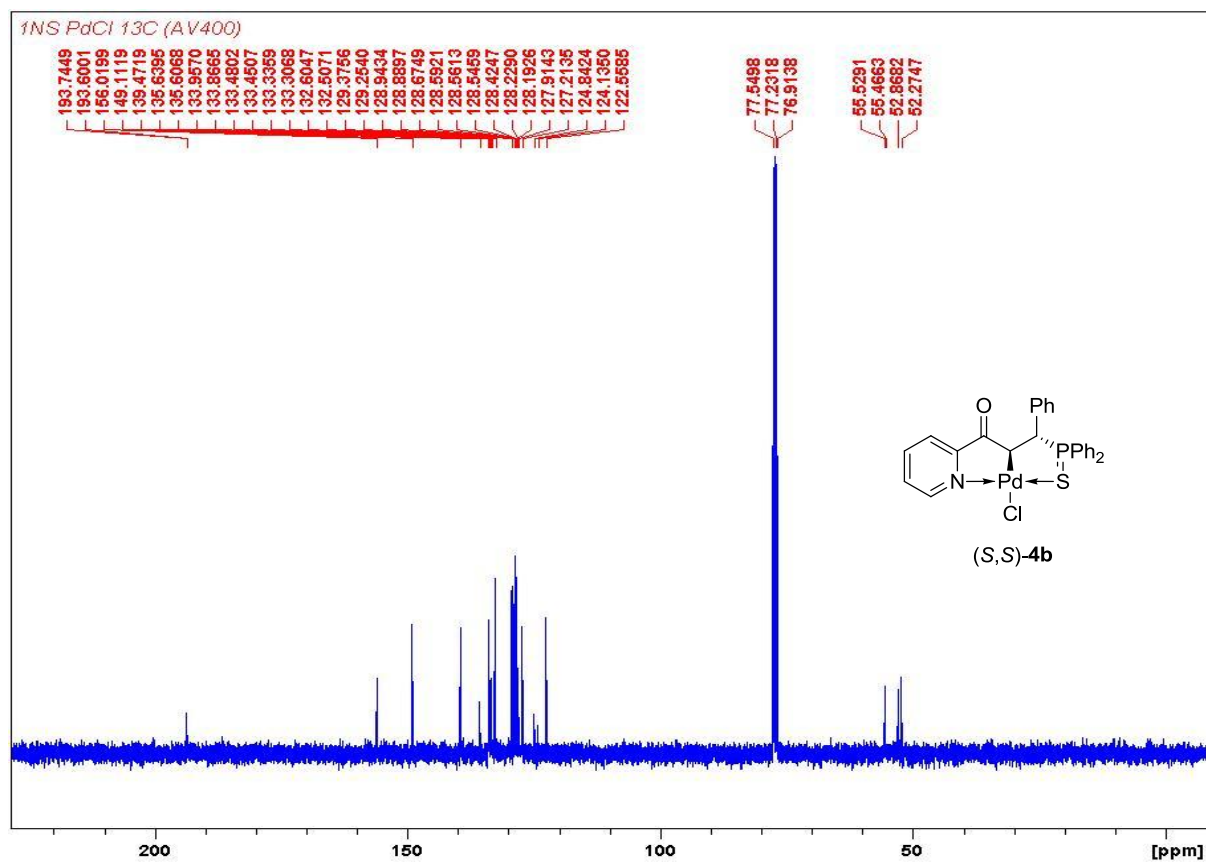

Figure s13. <sup>13</sup>C NMR spectrum of compound (*S,S*)-**4b**.

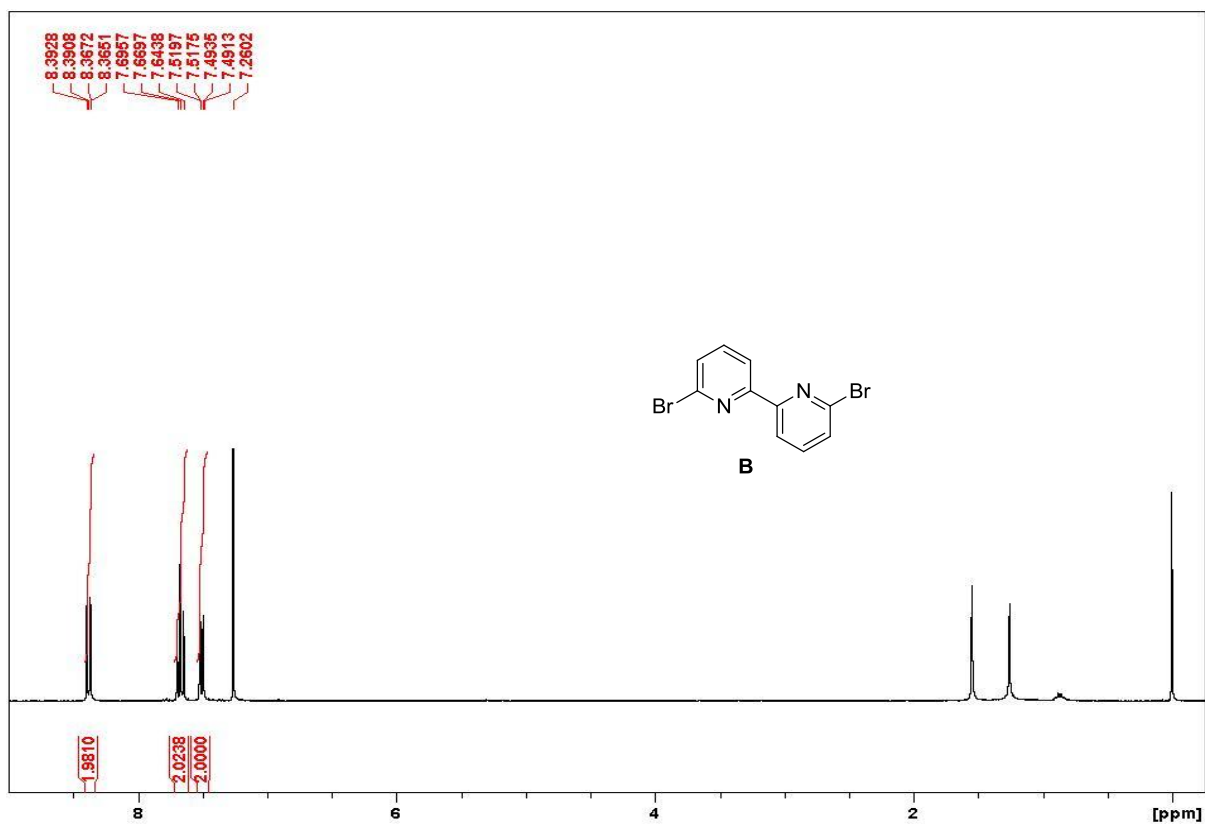

Figure s14. <sup>1</sup>H NMR spectrum of 6,6'-dibromo-2,2'-bipyridine B.

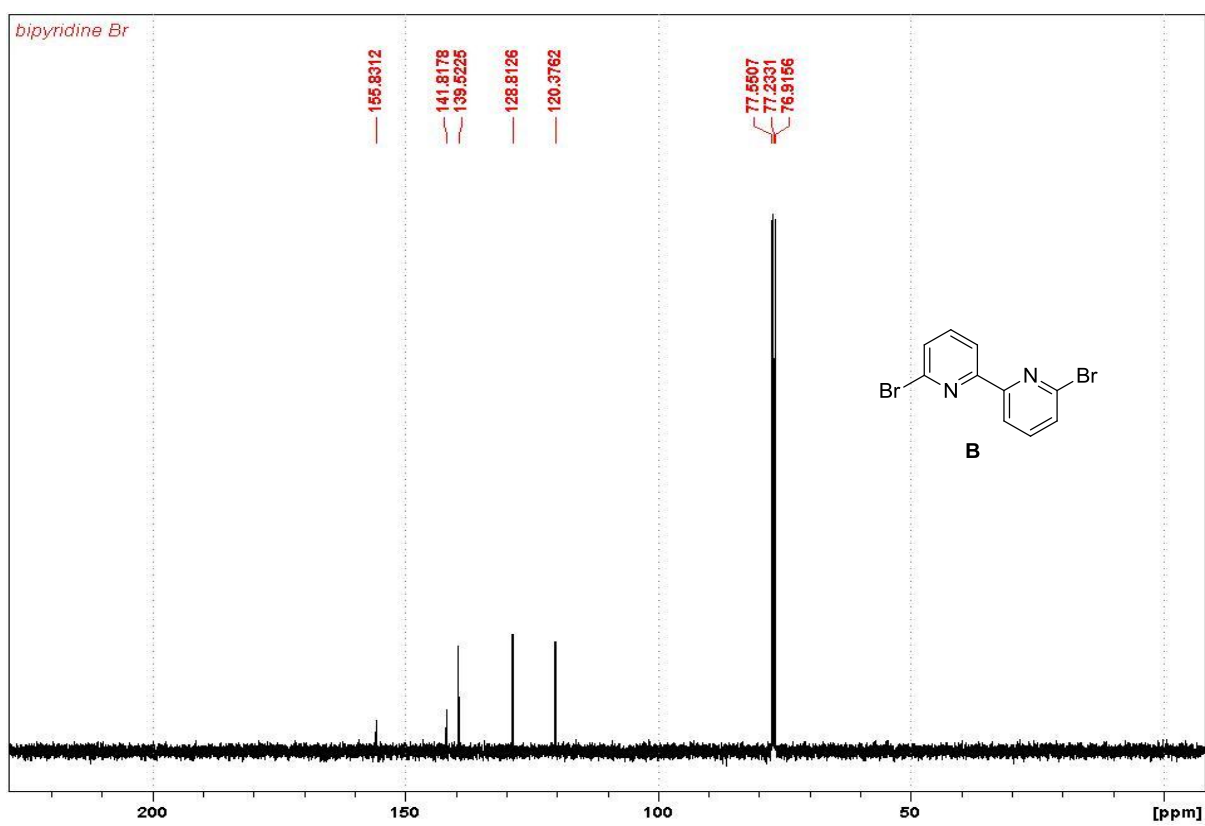

Figure s15. <sup>13</sup>C NMR spectrum of 6,6'-dibromo-2,2'-bipyridine B.

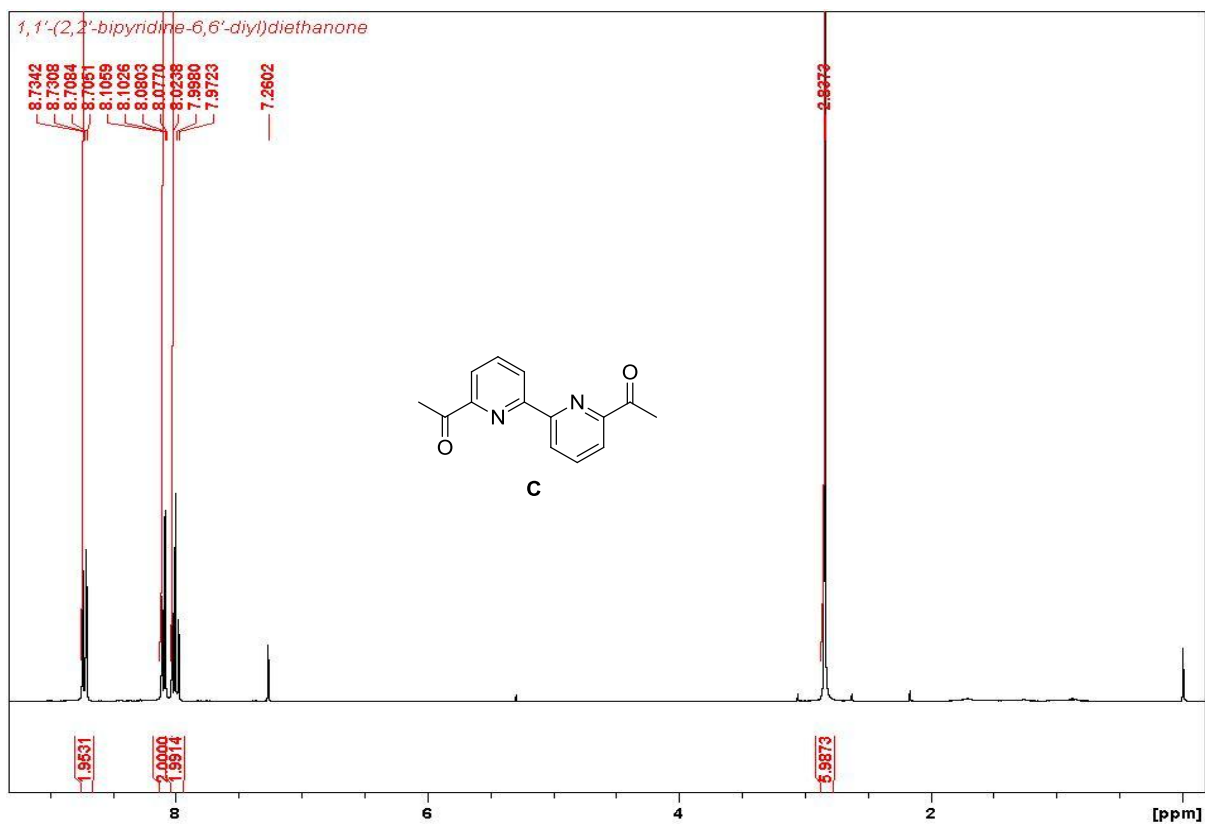

Figure s16. <sup>1</sup>H NMR spectrum of 1,1'-([2,2'-bipyridine]-6,6'-diyl)diethanone C.

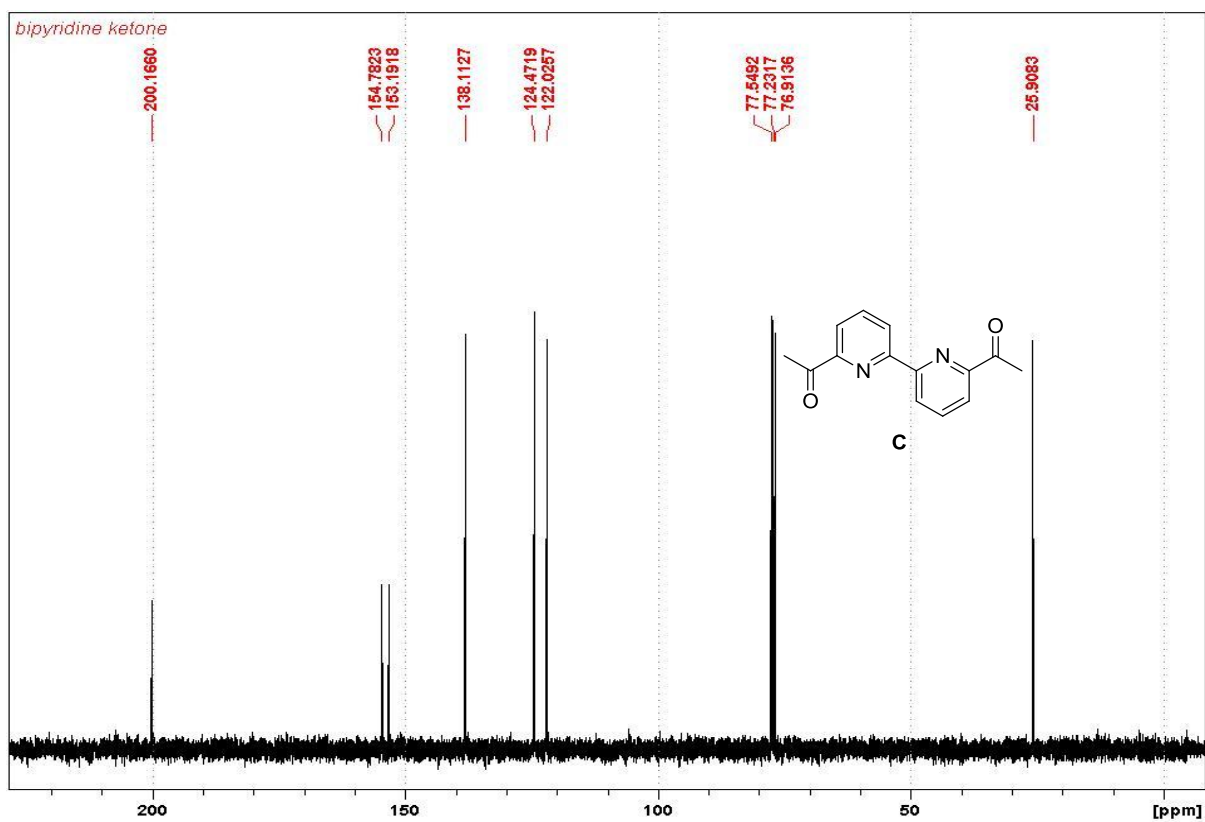

Figure s17. <sup>13</sup>C NMR spectrum of 1,1'-([2,2'-bipyridine]-6,6'-diyl)diethanone C.

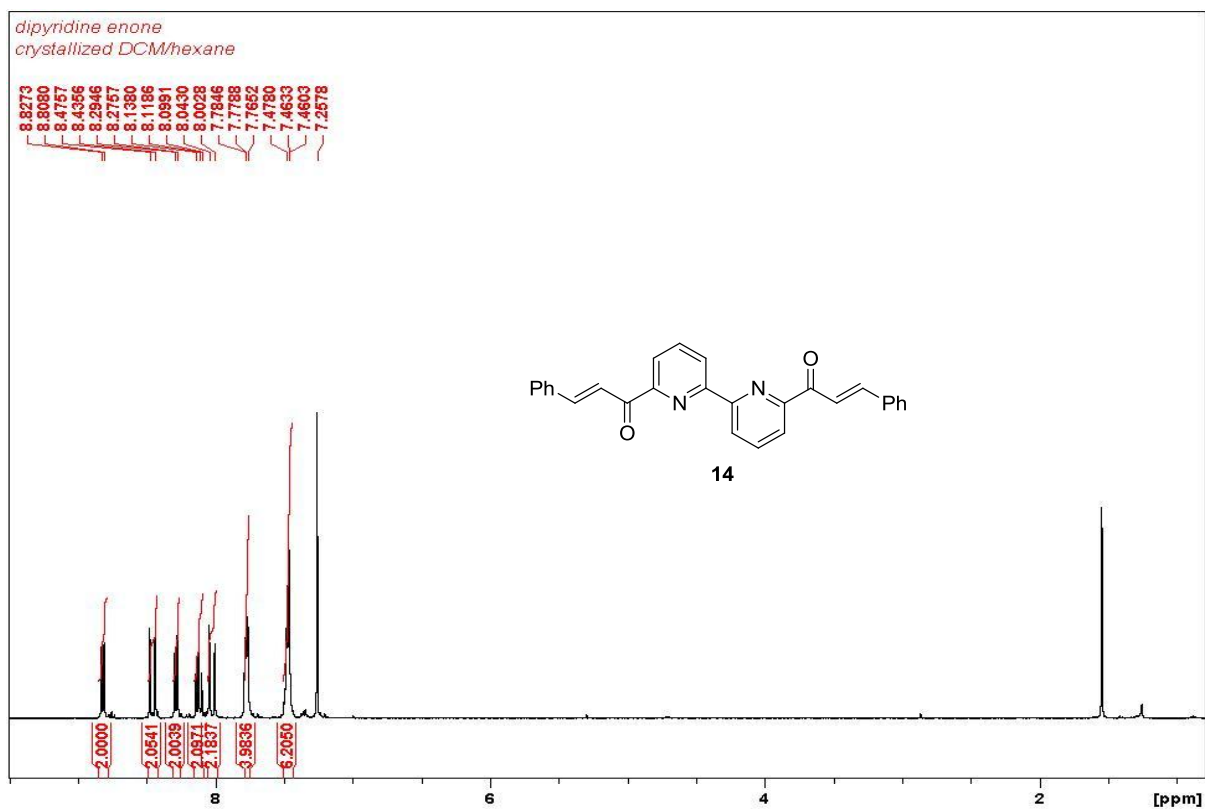

Figure s18. <sup>1</sup>H NMR spectrum of compound 14.

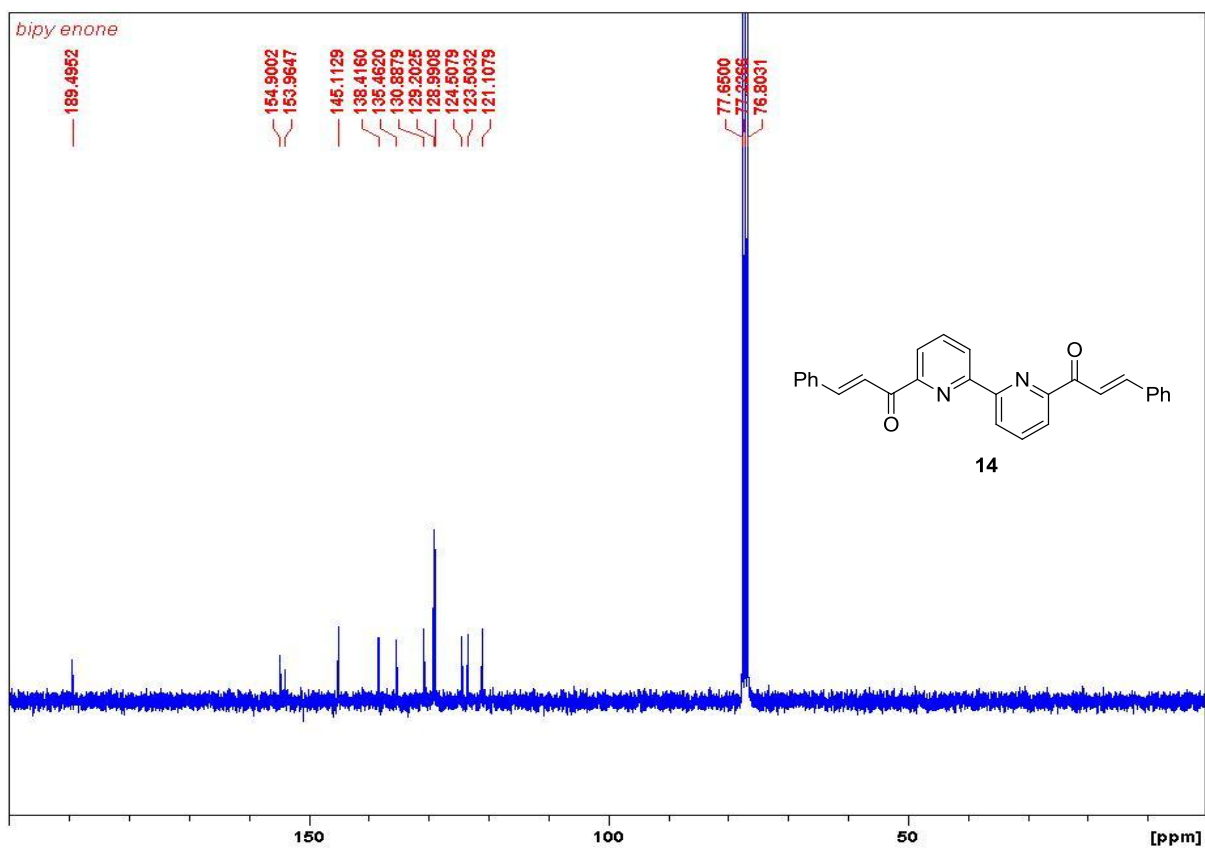

Figure s19. <sup>13</sup>C NMR spectrum of compound 14.

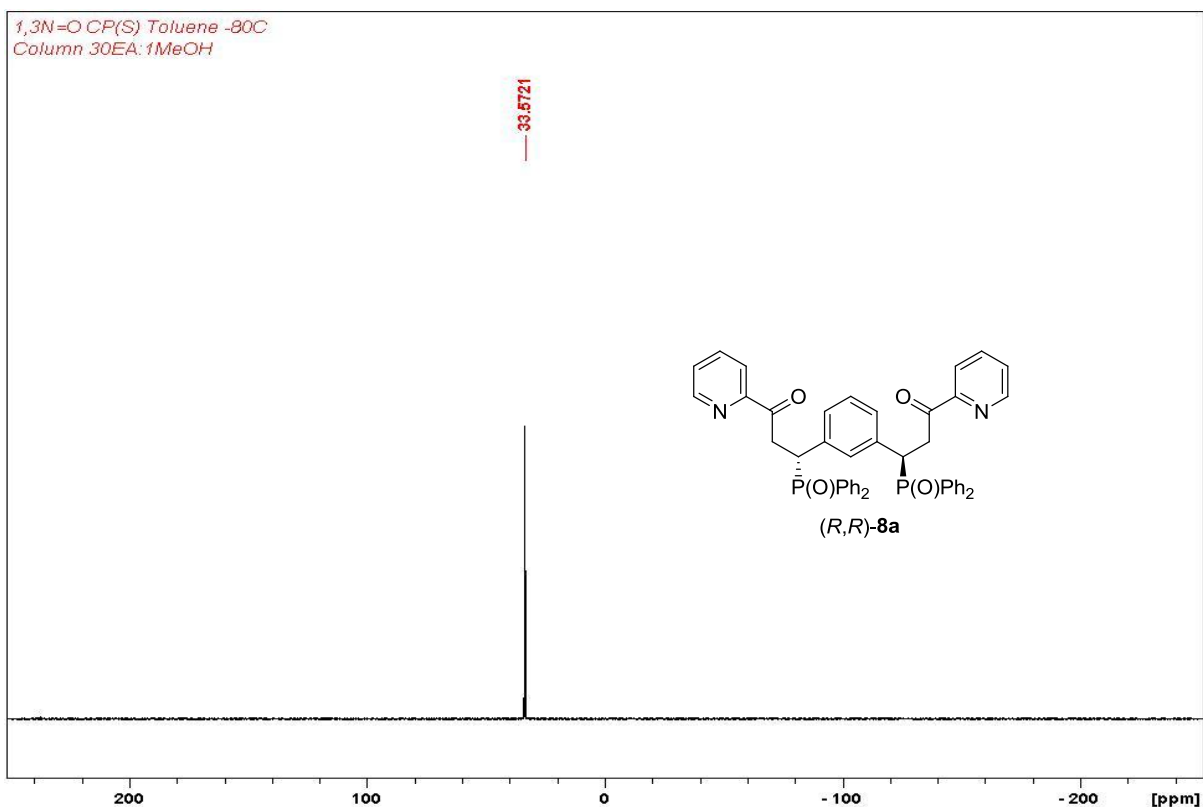

Figure s20.  $^{31}\text{P}\{^1\text{H}\}$  NMR spectrum of compound (R,R)-8a.

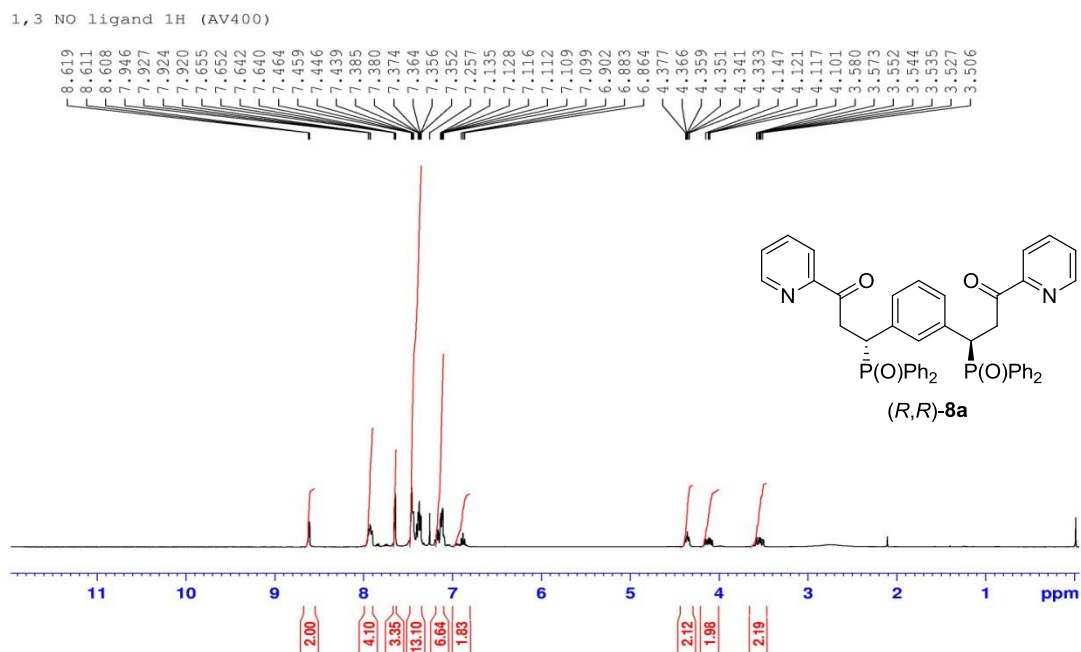

Figure s21.  $^1\text{H}$  NMR spectrum of compound (R,R)-8a.

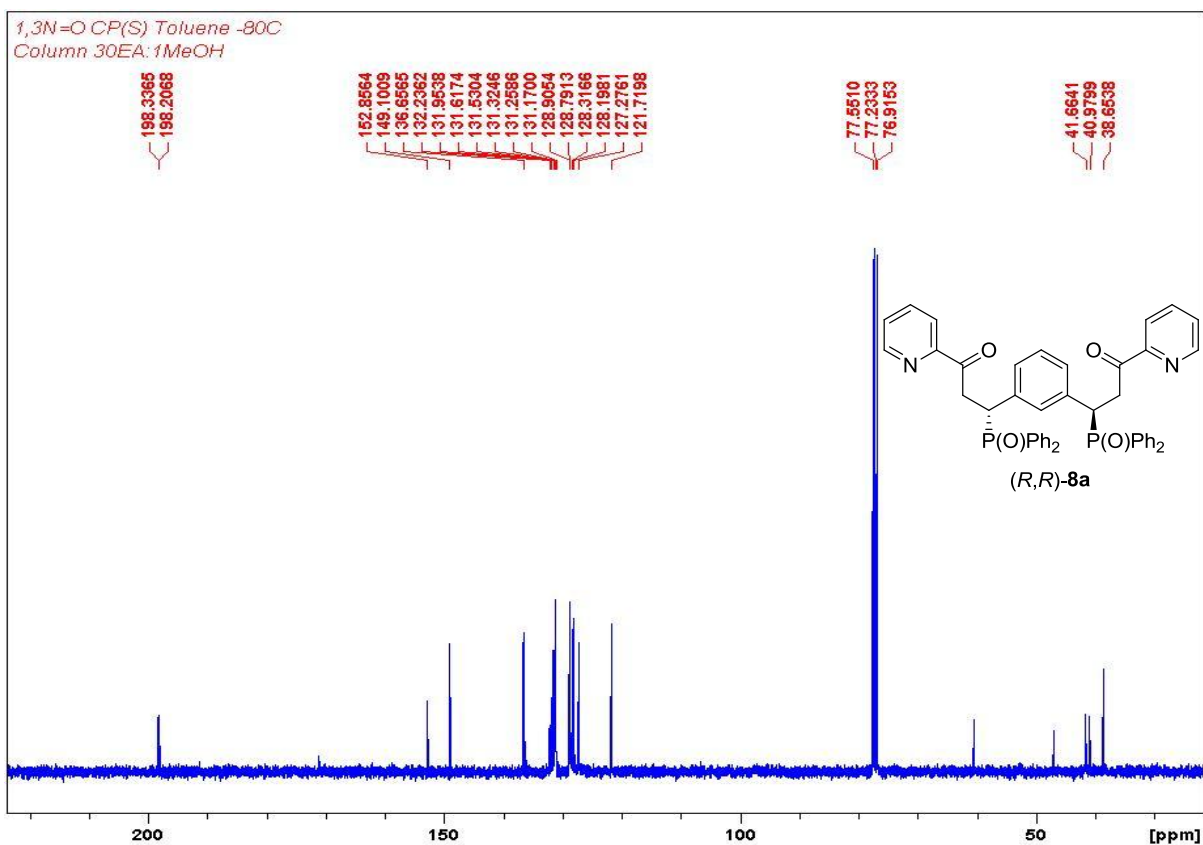

Figure s22.  $^{13}\text{C}$  NMR spectrum of compound (R,R)-8a.

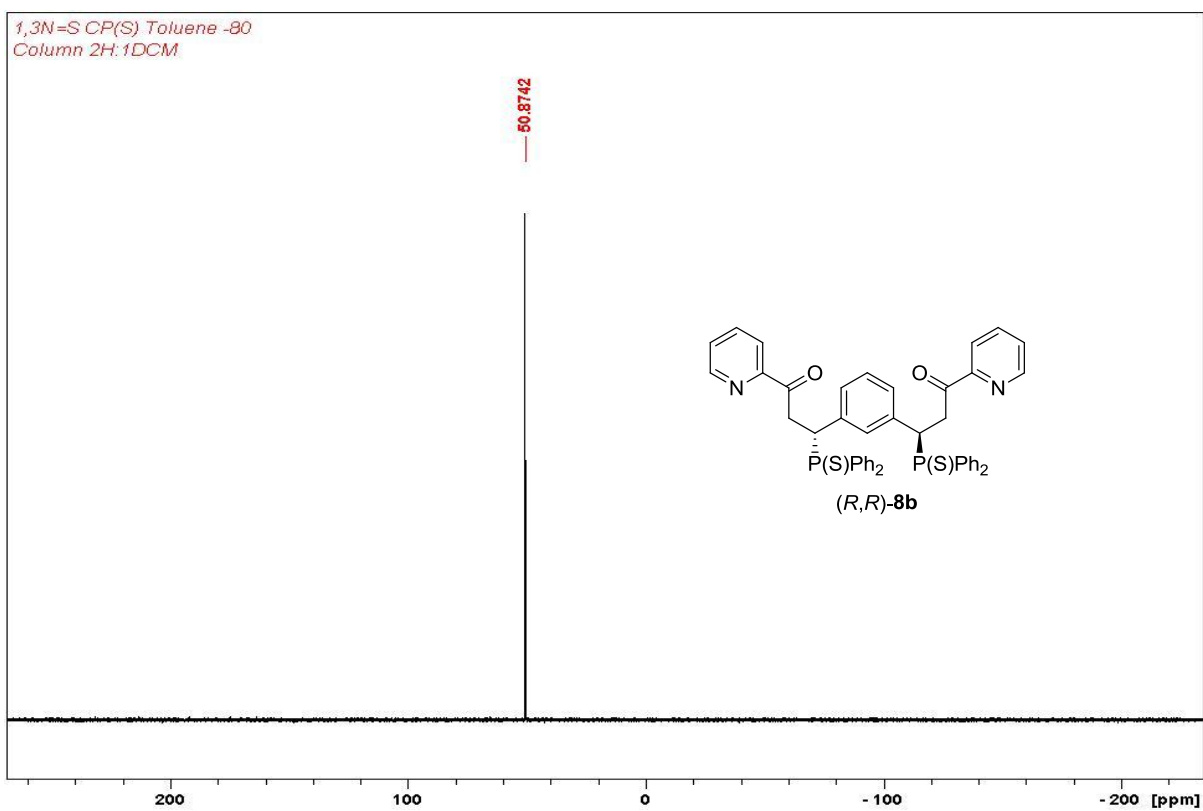

Figure s23.  $^{31}\text{P}\{^1\text{H}\}$  NMR spectrum of compound (R,R)-8b.

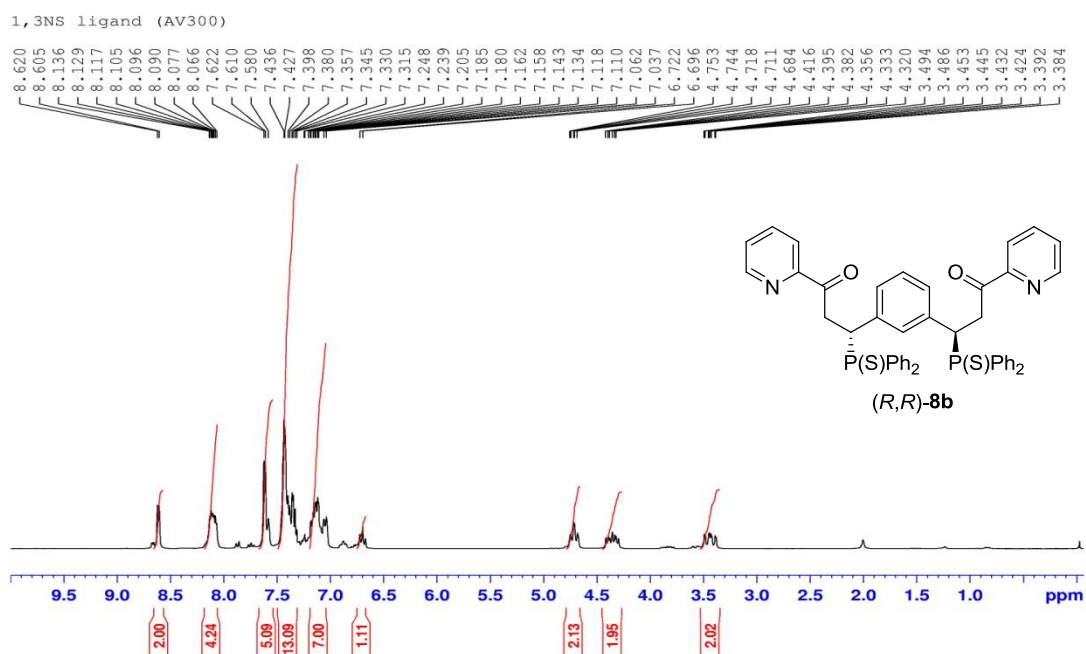

Figure s24.  $^1\text{H}$  NMR spectrum of compound **(R,R)-8b**.

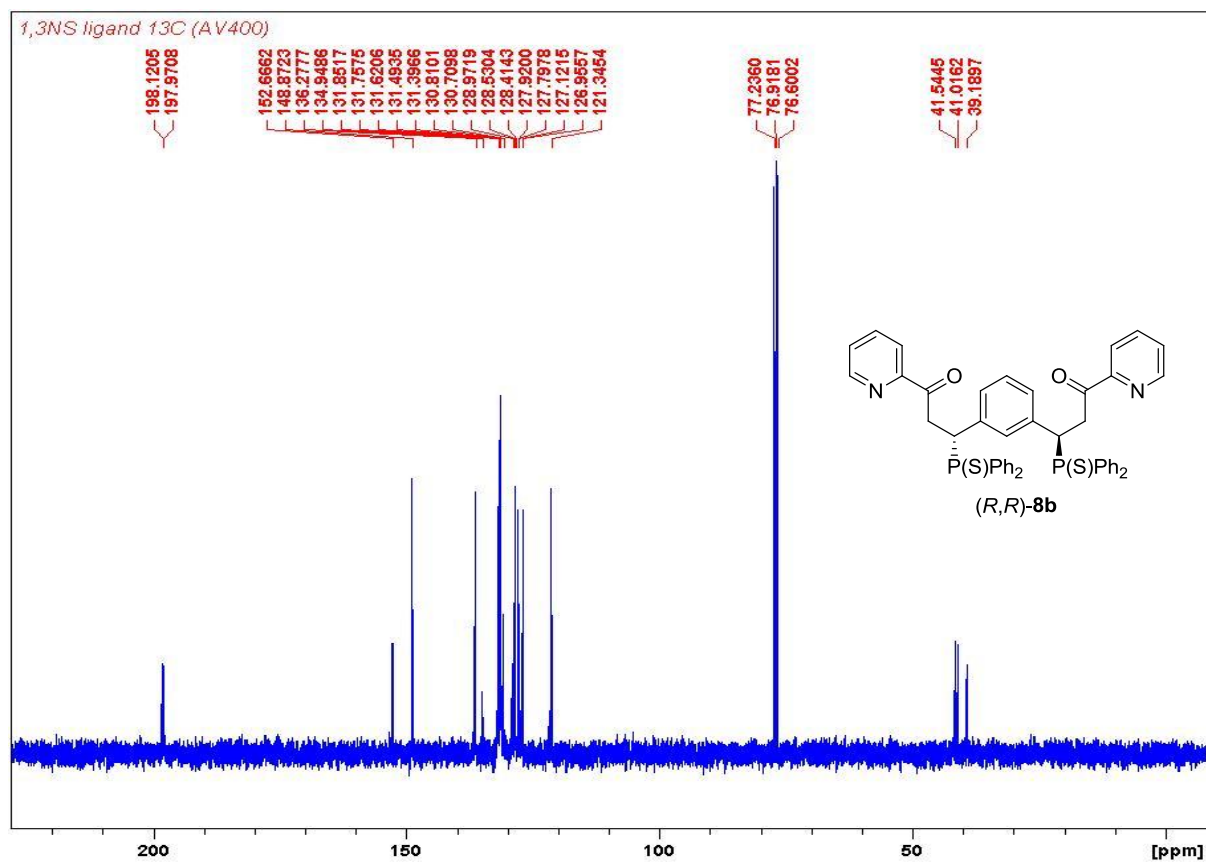

Figure s25.  $^{13}\text{C}$  NMR spectrum of compound **(R,R)-8b**.



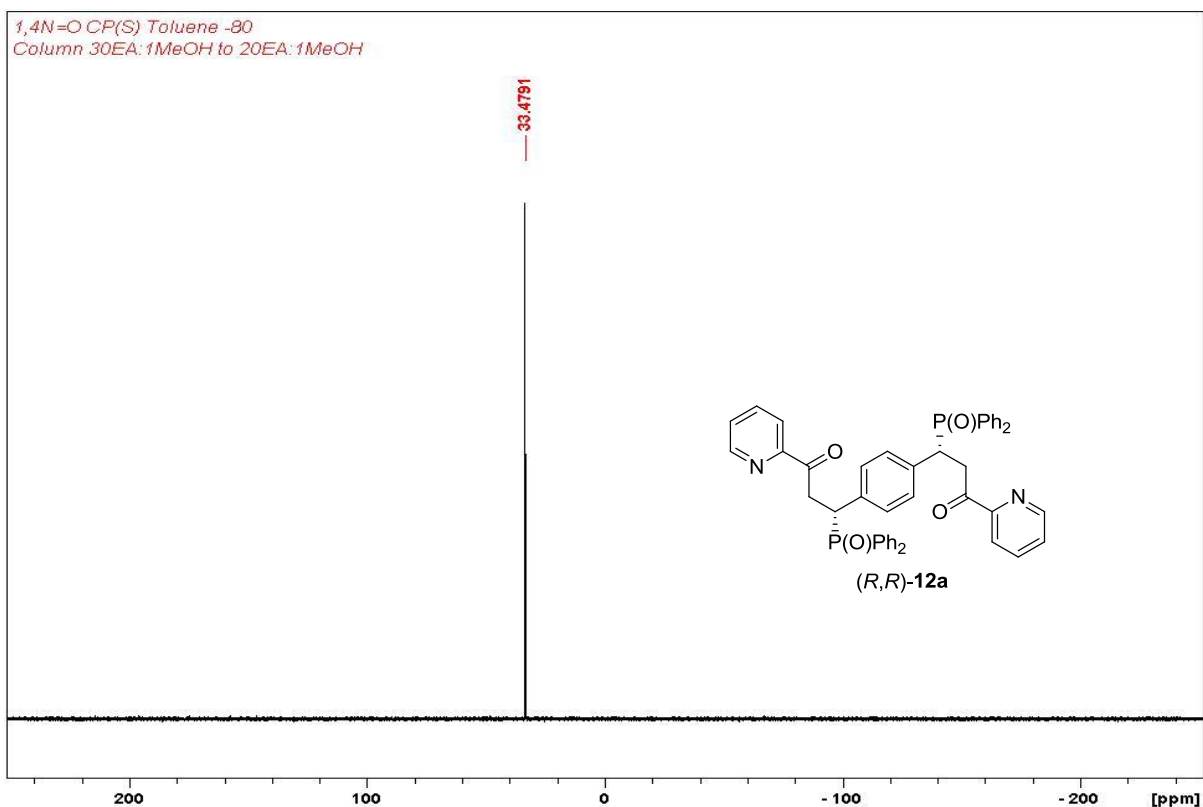

Figure s26.  $^{31}\text{P}\{^1\text{H}\}$  NMR spectrum of compound (R,R)-12a.

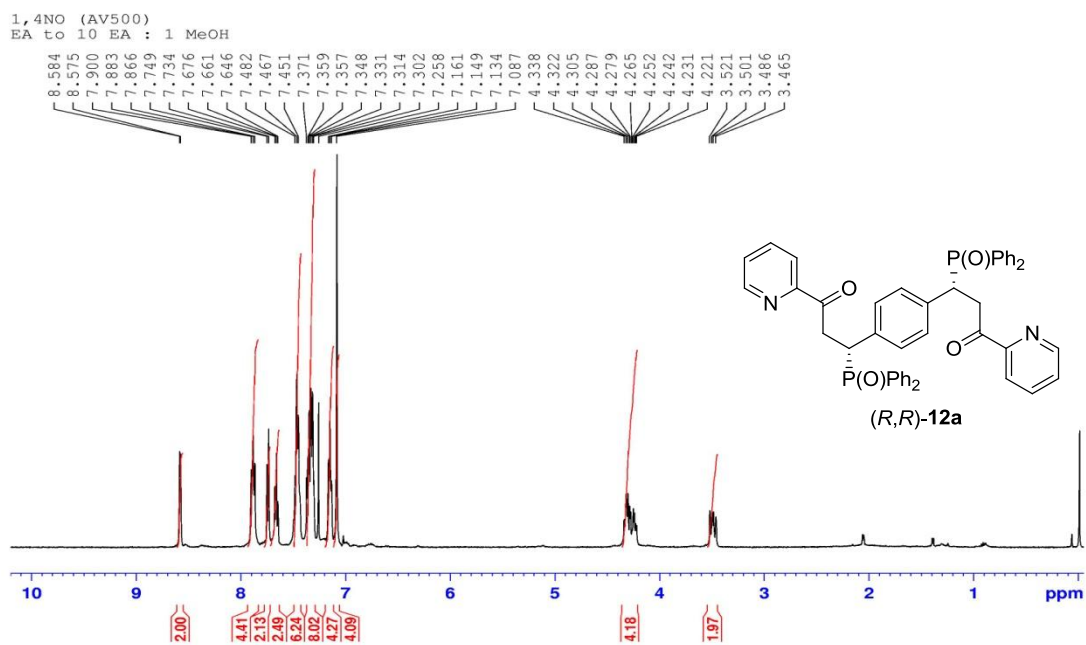

Figure s27.  $^1\text{H}$  NMR spectrum of compound (R,R)-12a.

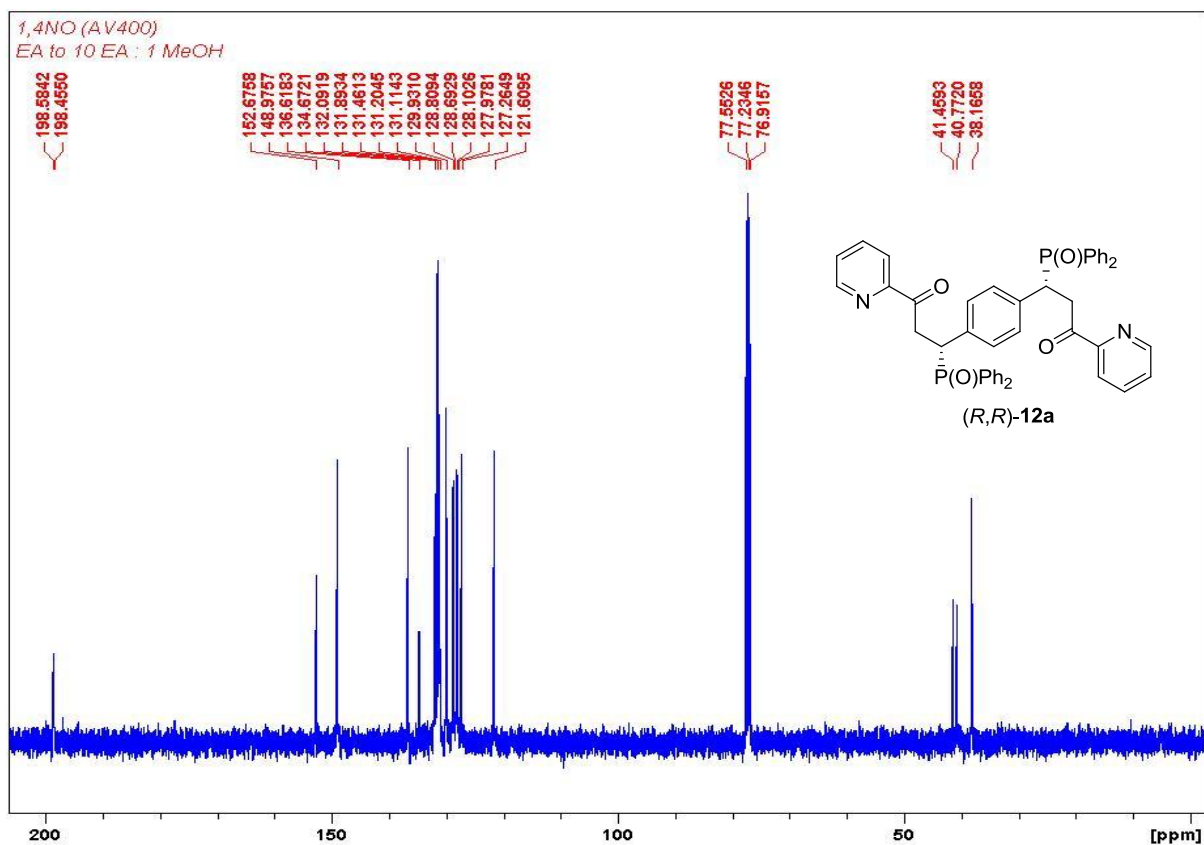

Figure s28.  $^{13}\text{C}$  NMR spectrum of compound (*R,R*)-12a.

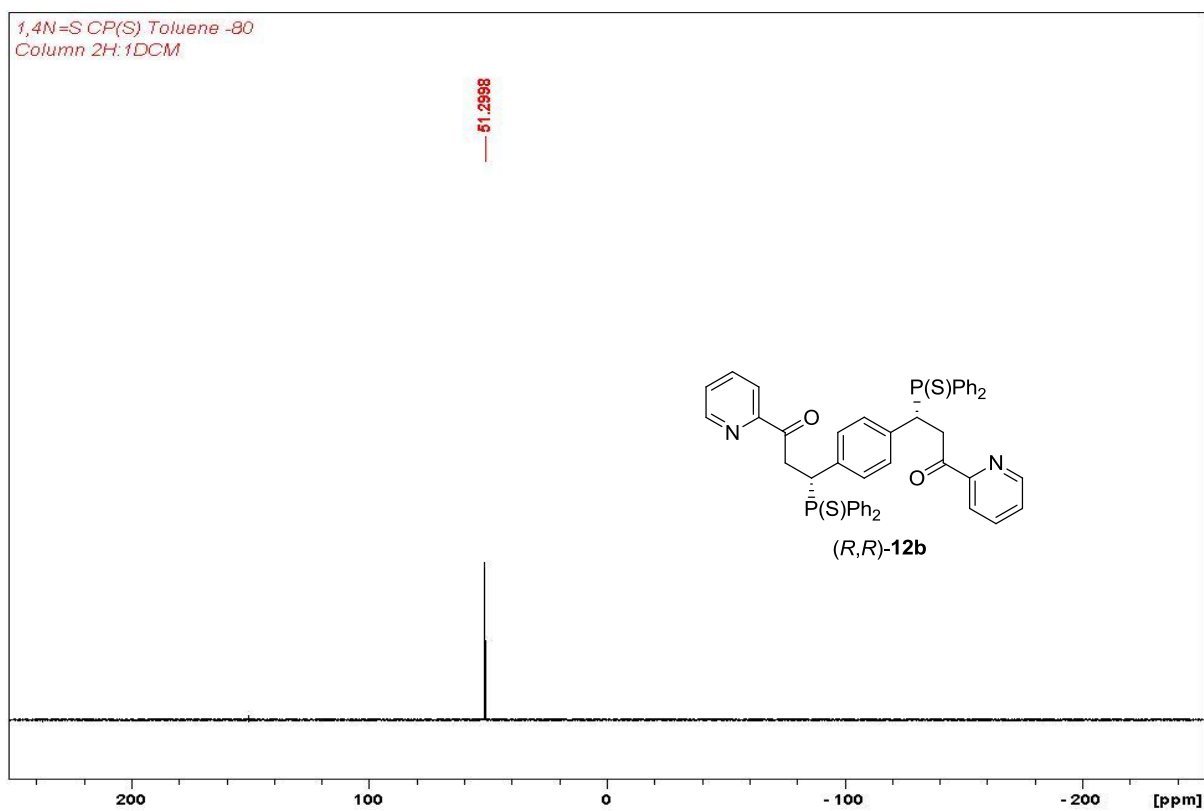

Figure s29.  $^{31}\text{P}\{^1\text{H}\}$  NMR spectrum of compound (*R,R*)-12b.

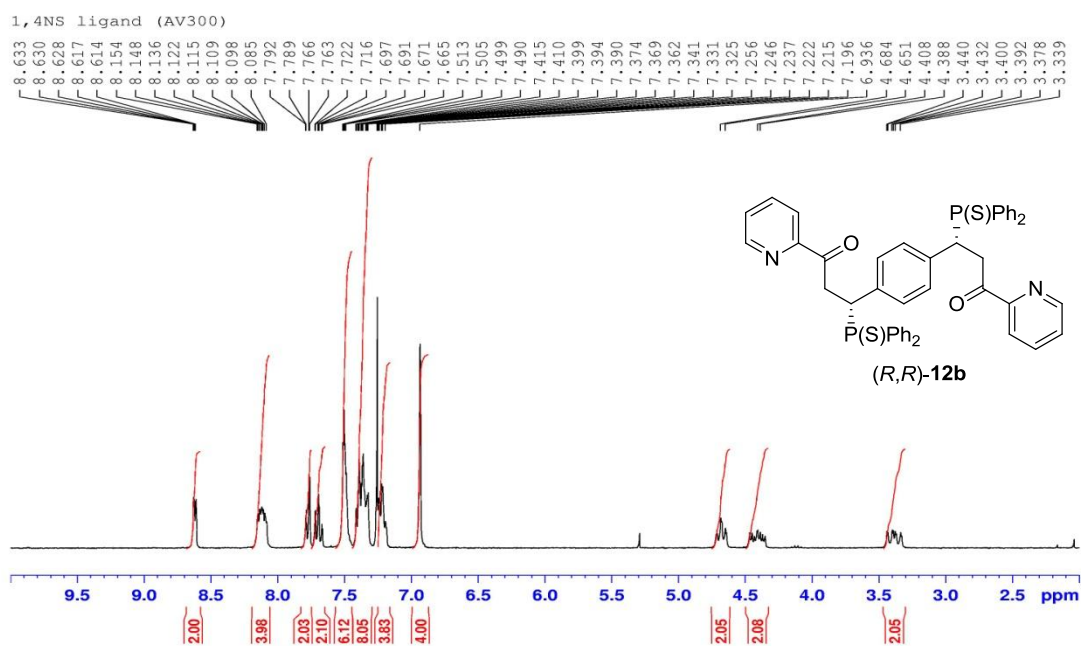

Figure s30.  $^1\text{H}$  NMR spectrum of compound (*R,R*)-12b.

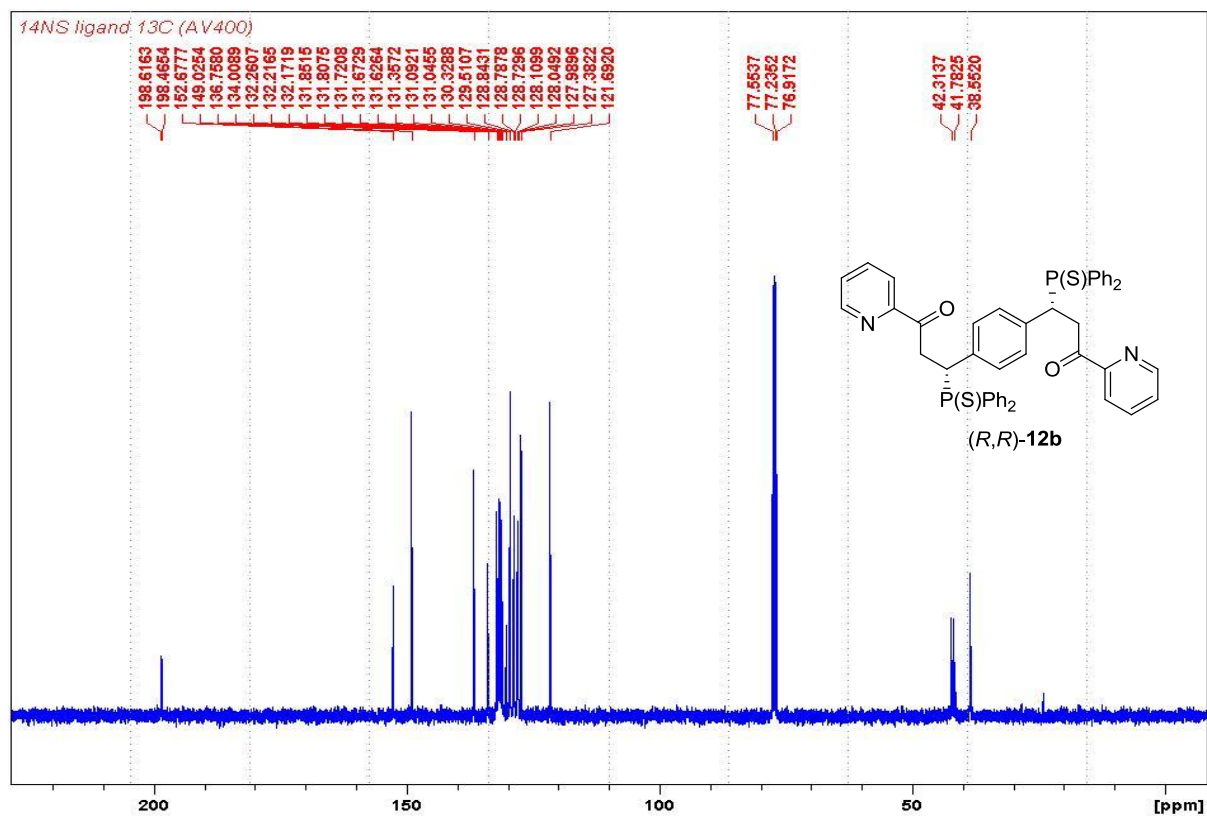

Figure s31.  $^{13}\text{C}$  NMR spectrum of compound (*R,R*)-12b.

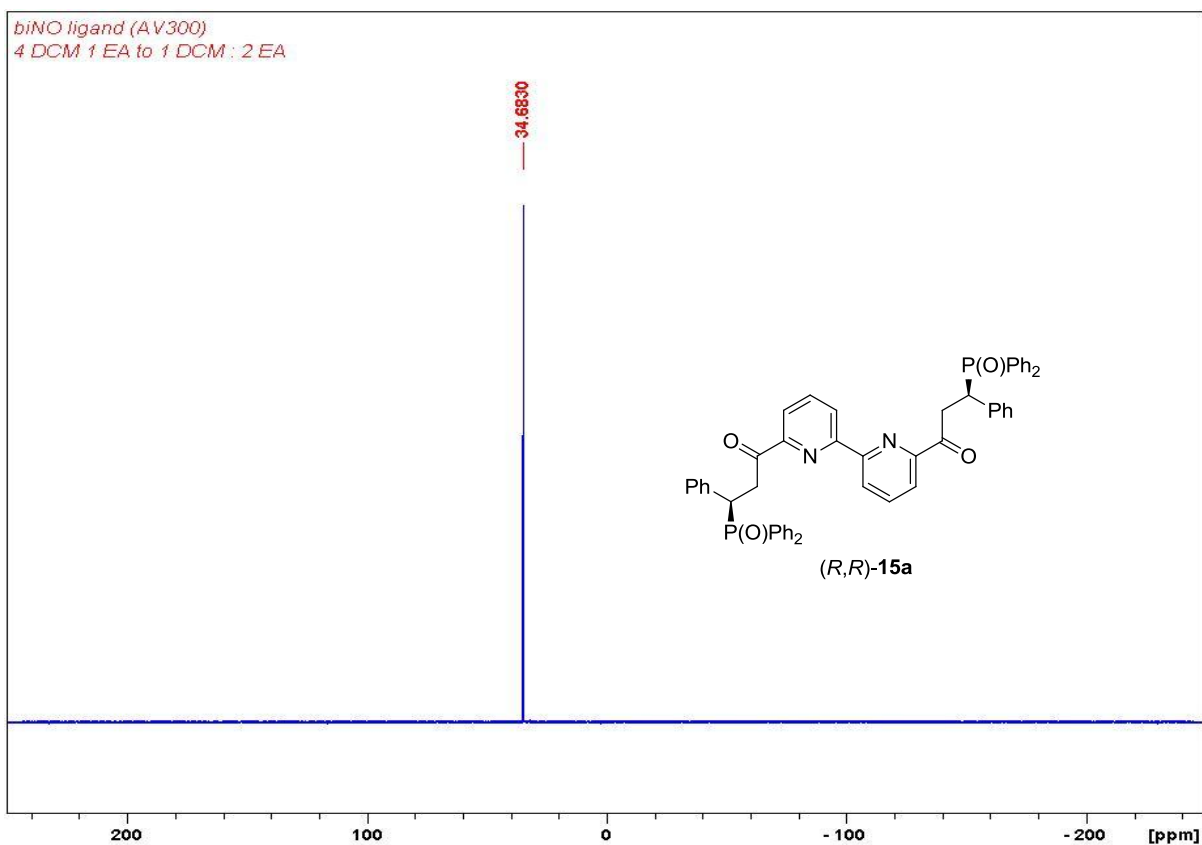

Figure s32.  $^{31}\text{P}\{^1\text{H}\}$  NMR spectrum of compound (R,R)-15a.

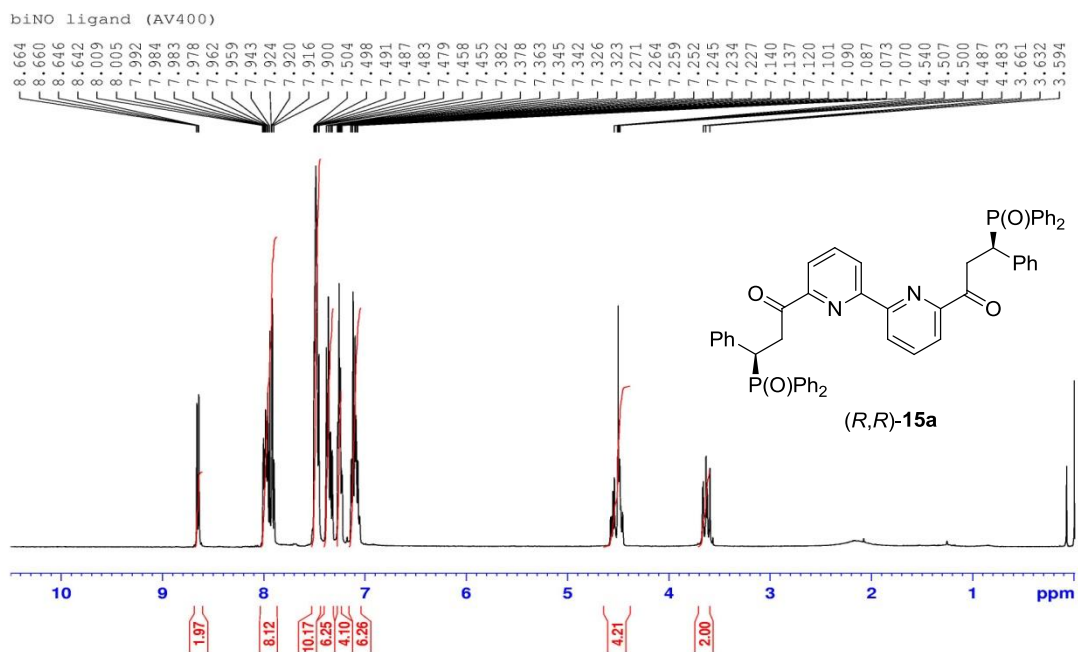

Figure s33.  $^1\text{H}$  NMR spectrum of compound (R,R)-15a.

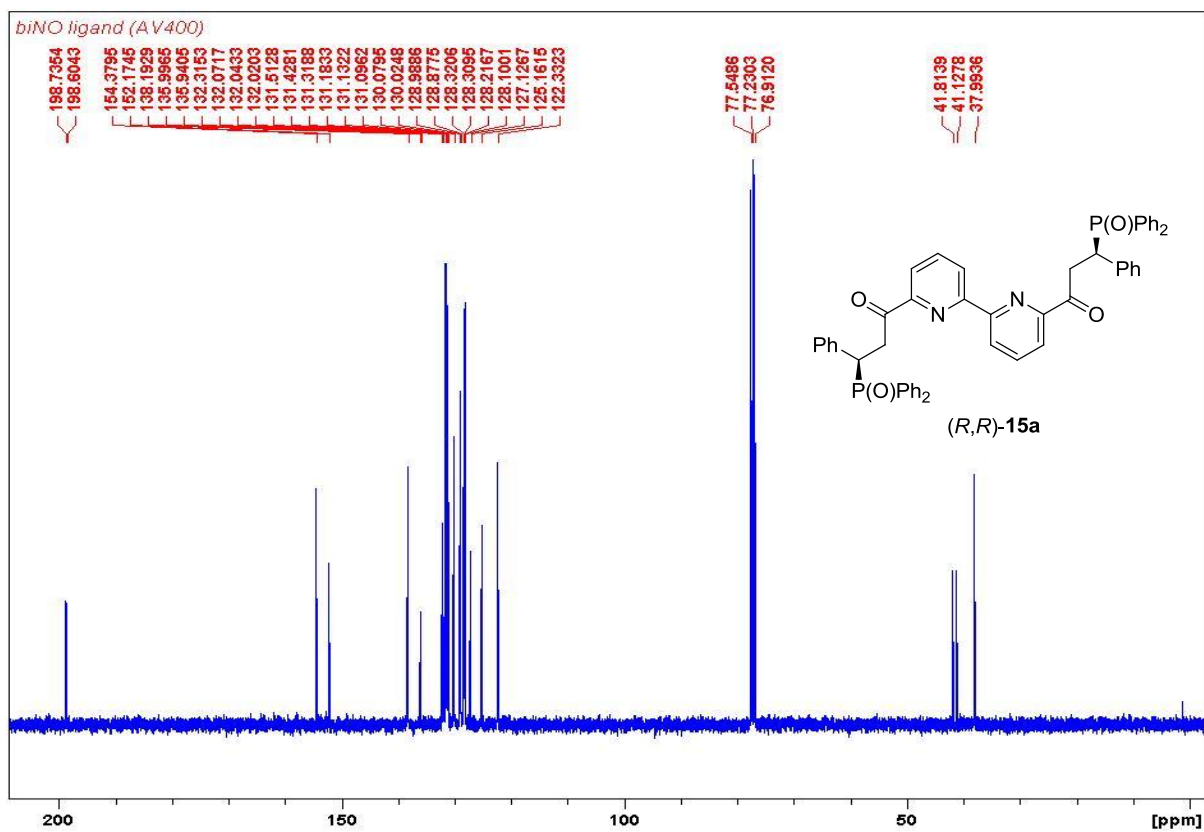

Figure s34.  $^{13}\text{C}$  NMR spectrum of compound (*R,R*)-15a.

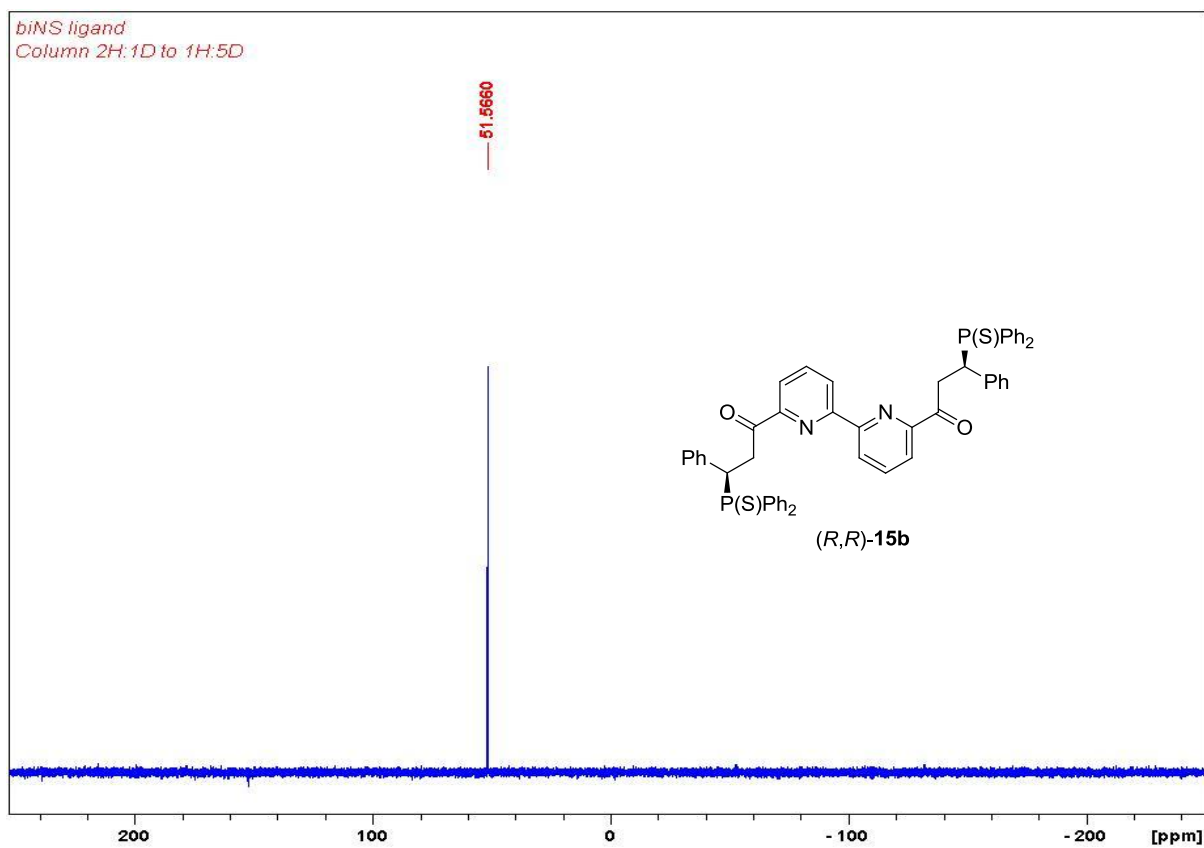

Figure s35.  $^{31}\text{P}\{^1\text{H}\}$  NMR spectrum of compound (*R,R*)-15b.

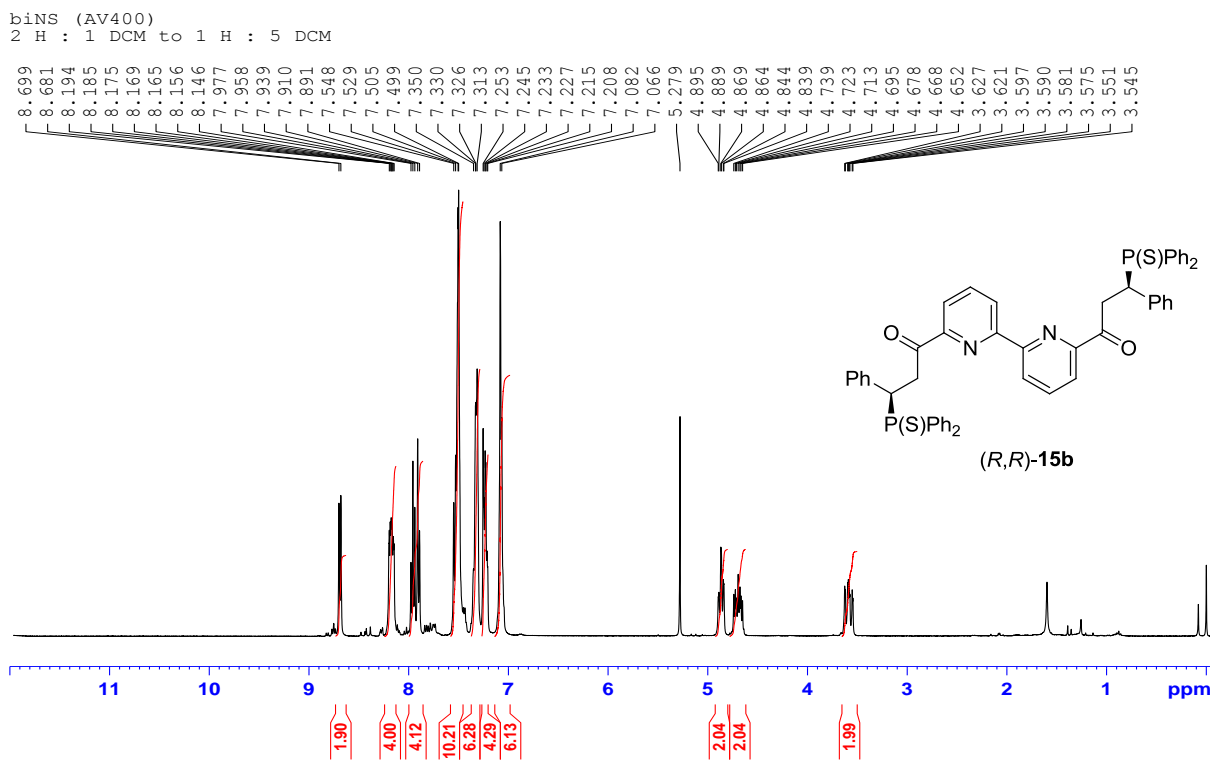

Figure s36. <sup>1</sup>H NMR spectrum of compound (*R,R*)-15b.

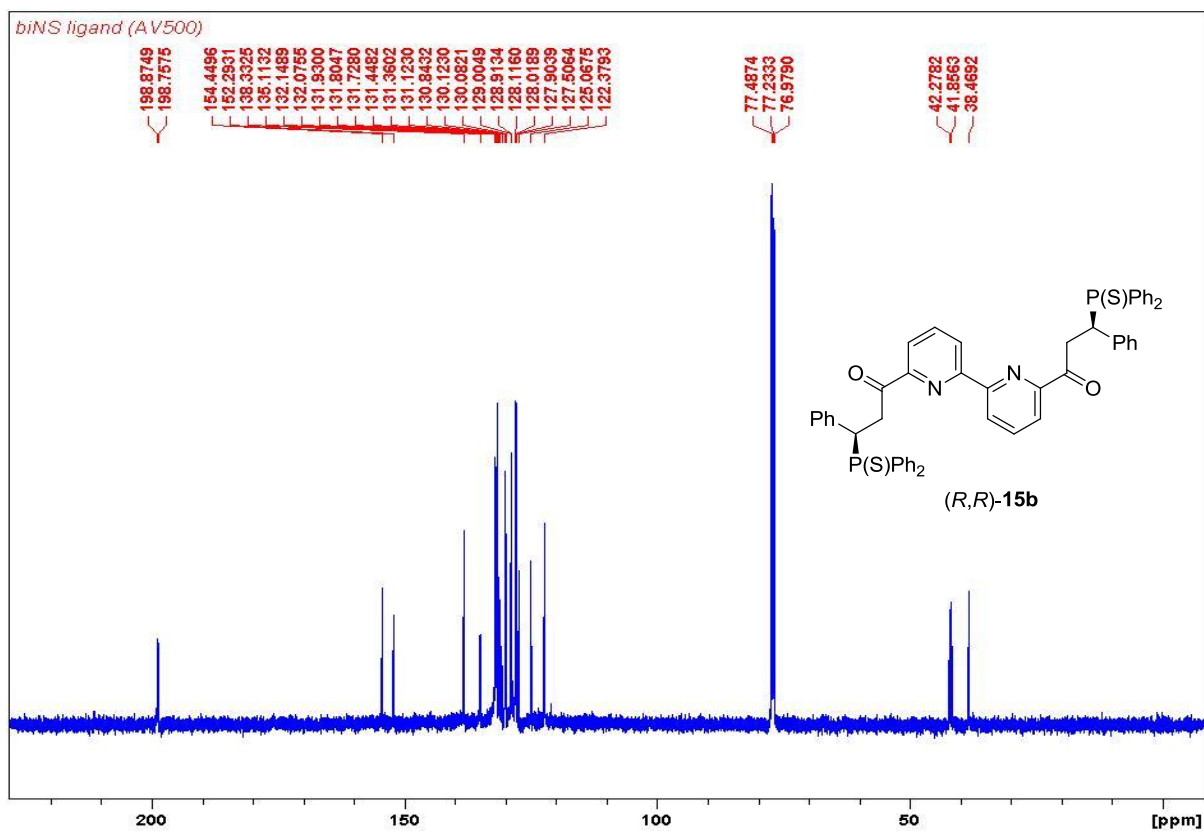

Figure s37. <sup>13</sup>C NMR spectrum of compound (*R,R*)-15b.

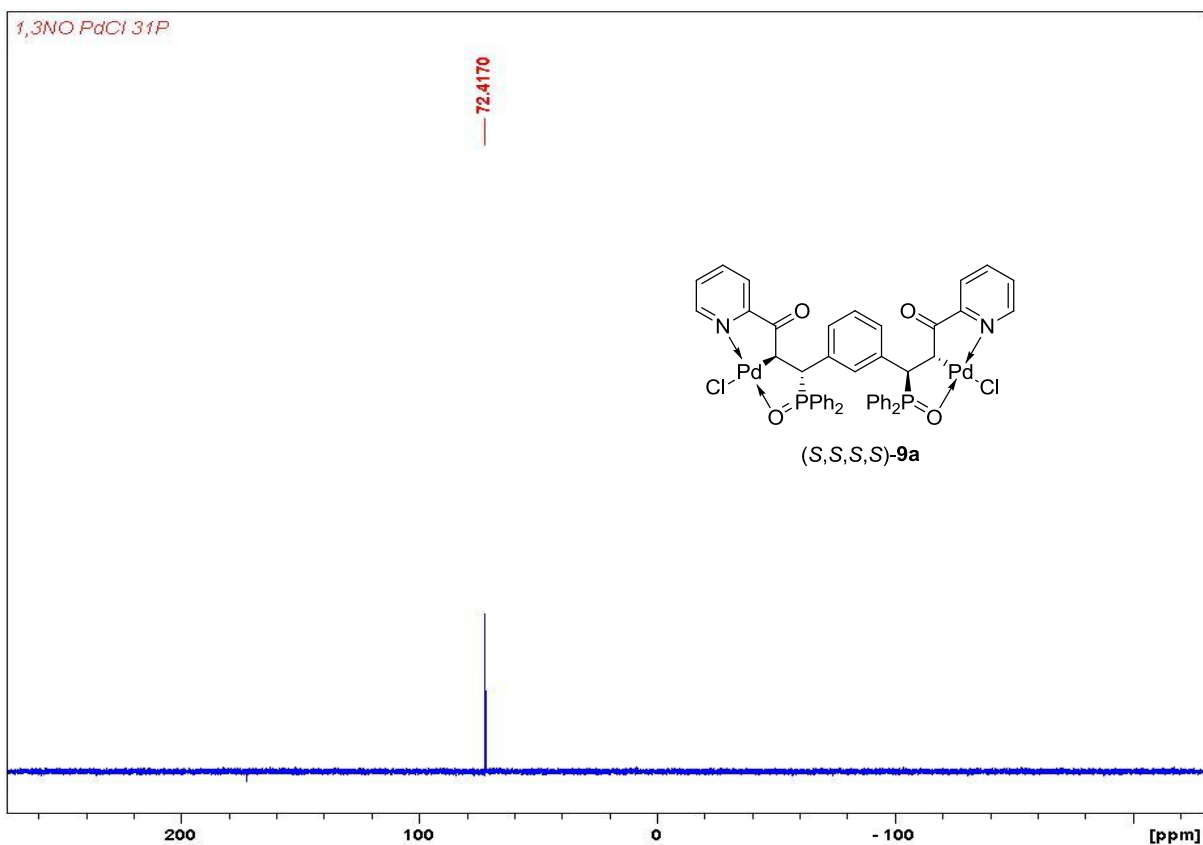

Figure s38.  $^{31}\text{P}\{^1\text{H}\}$  NMR spectrum of complex (*S,S,S,S*)-**9a**.

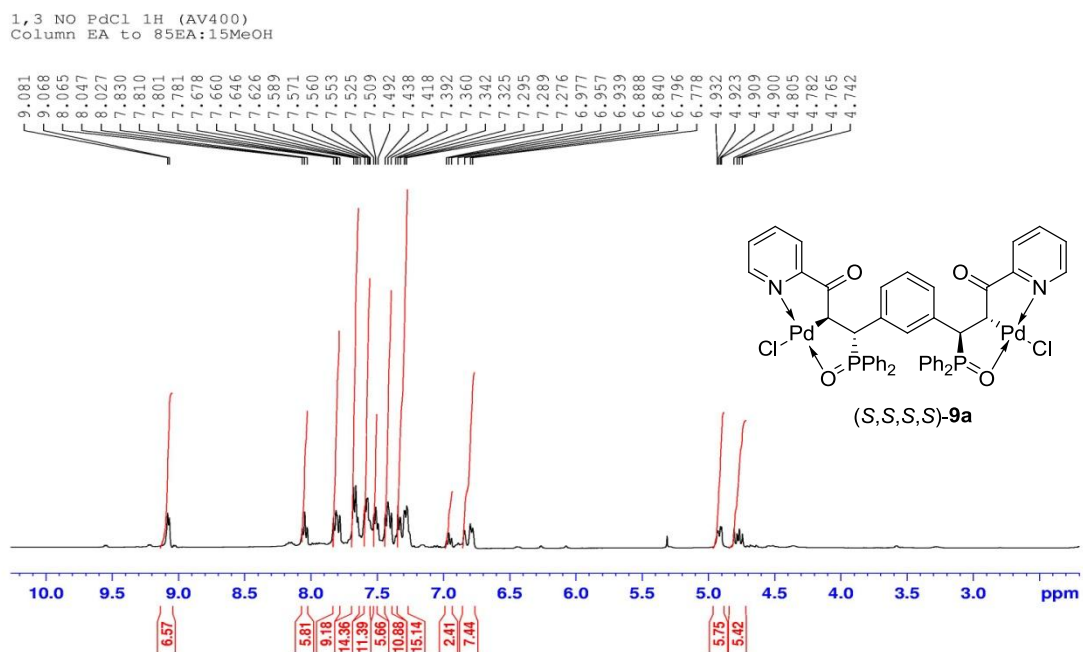

Figure s39.  $^1\text{H}$  NMR spectrum of complex (*S,S,S,S*)-**9a**.

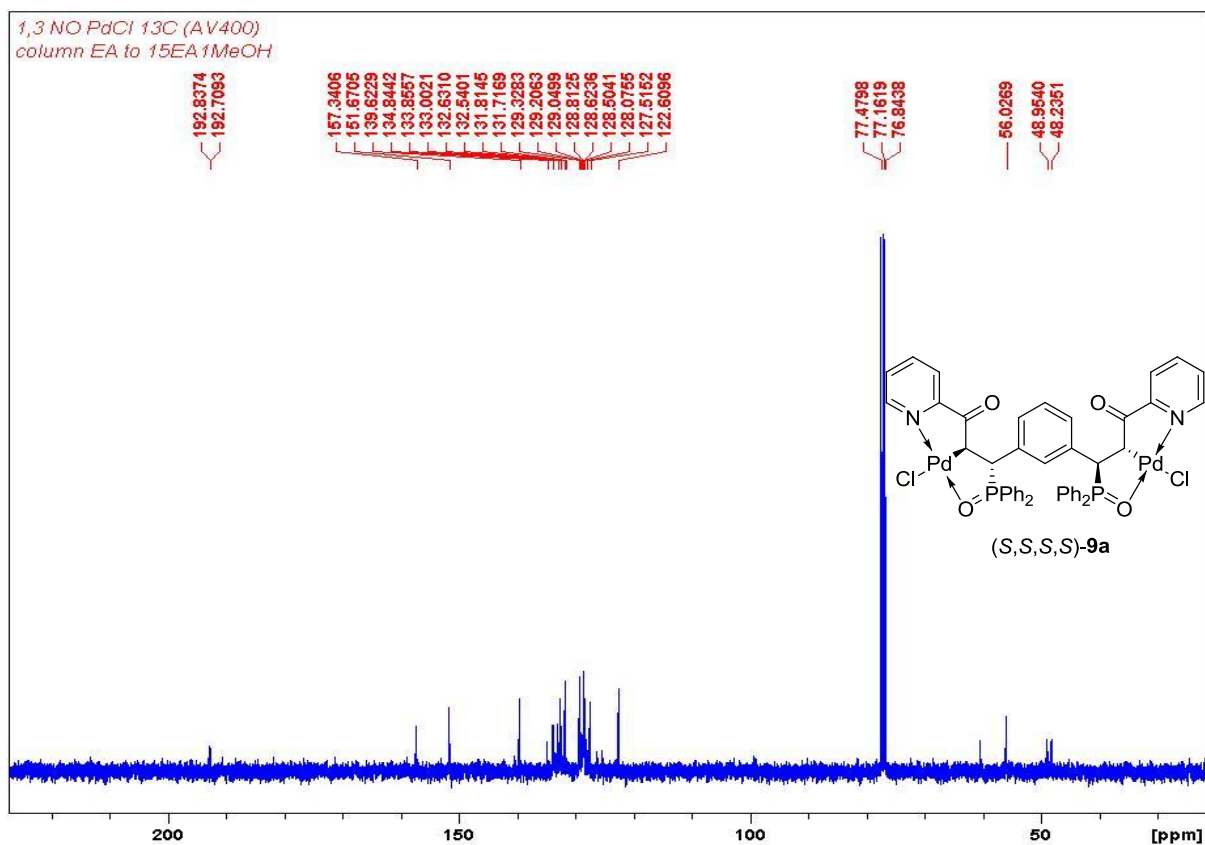

Figure s40.  $^{13}\text{C}$  NMR spectrum of complex **(S,S,S,S)-9a**.

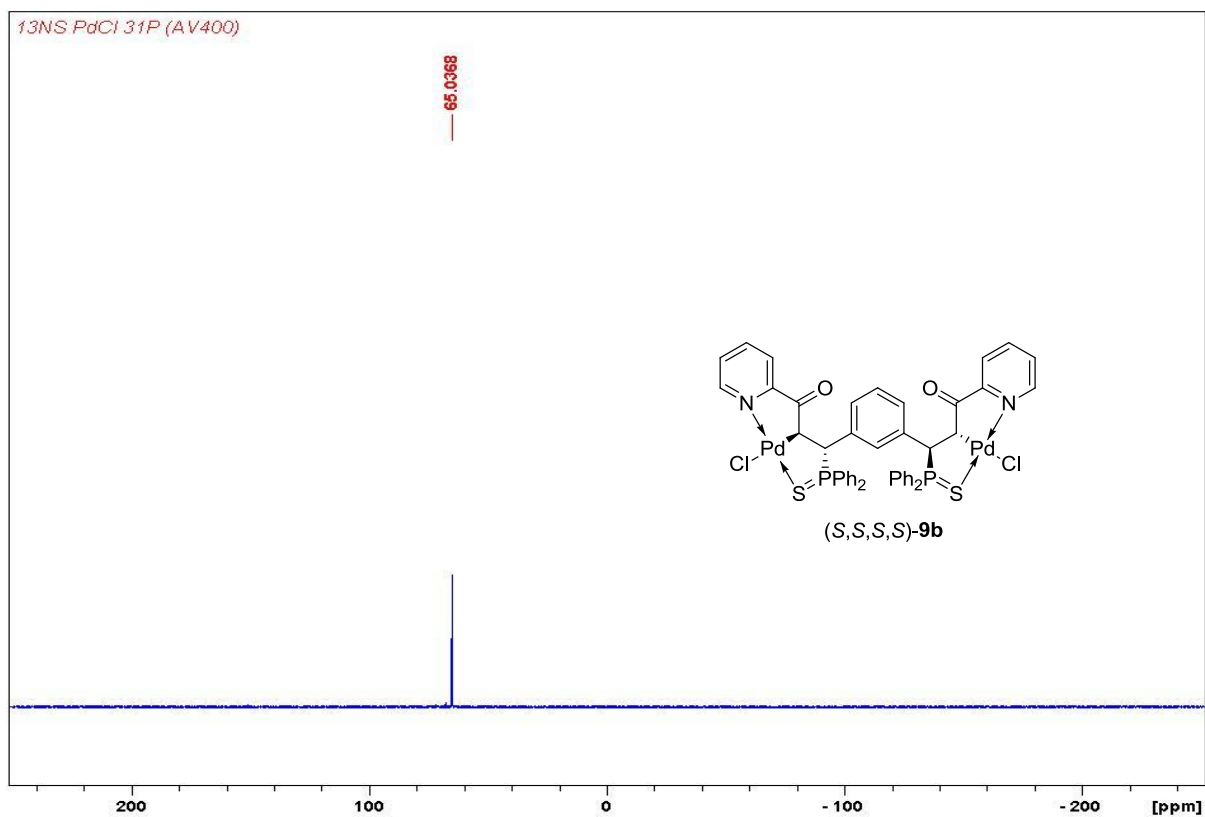

Figure s41.  $^{31}\text{P}\{^1\text{H}\}$  NMR spectrum of complex **(S,S,S,S)-9b**.



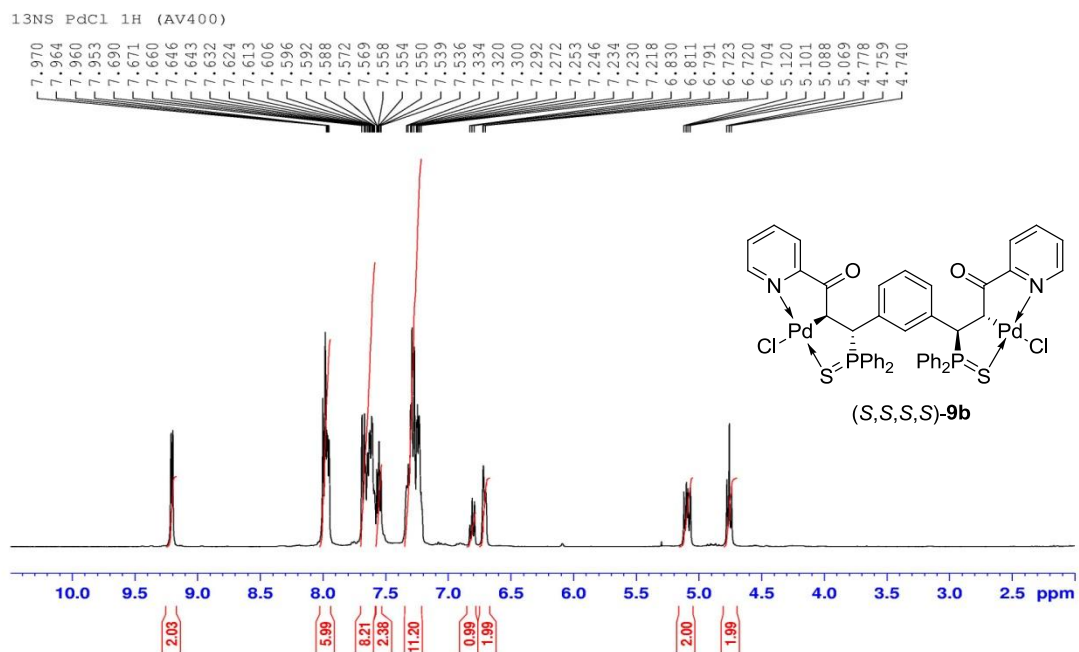

Figure s42.  $^1\text{H}$  NMR spectrum of complex (S,S,S,S)-9b.

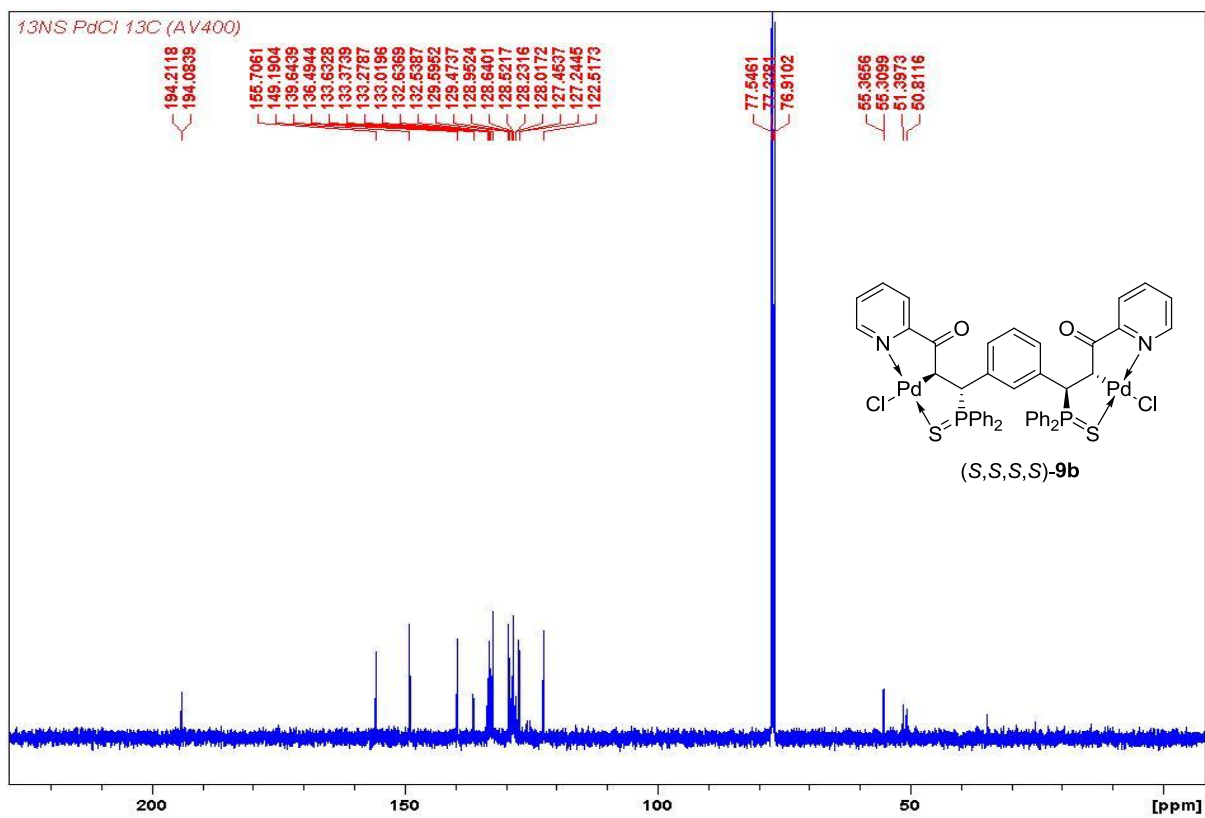

Figure s43.  $^{13}\text{C}$  NMR spectrum of complex (S,S,S,S)-9b.

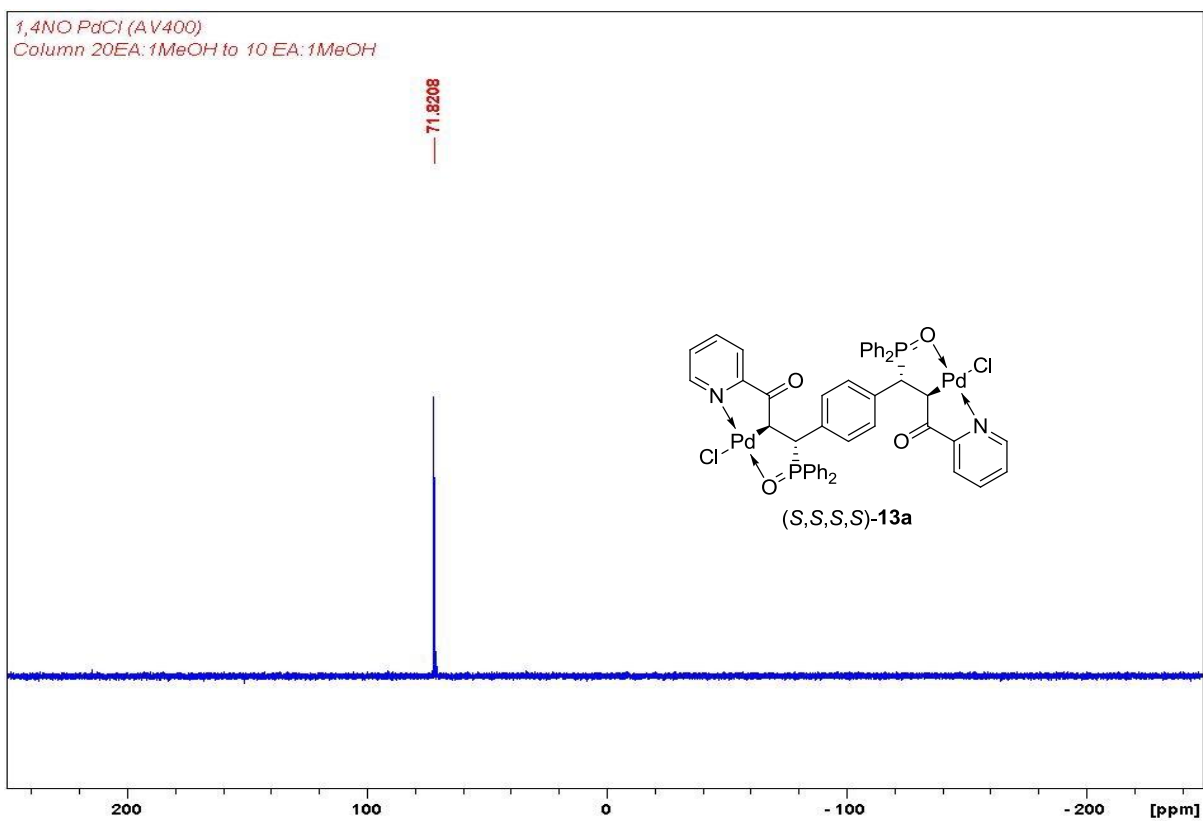

Figure s44.  $^{31}\text{P}\{^1\text{H}\}$  NMR spectrum of complex (*S,S,S,S*)-13a.

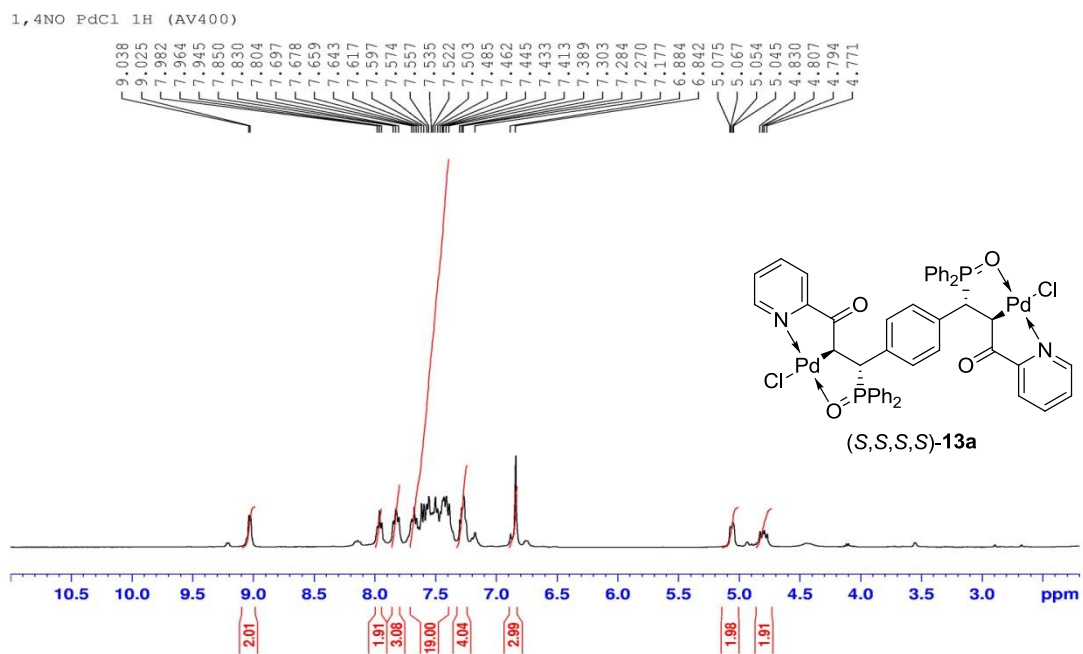

Figure s45.  $^1\text{H}$  NMR spectrum of complex (*S,S,S,S*)-13a.

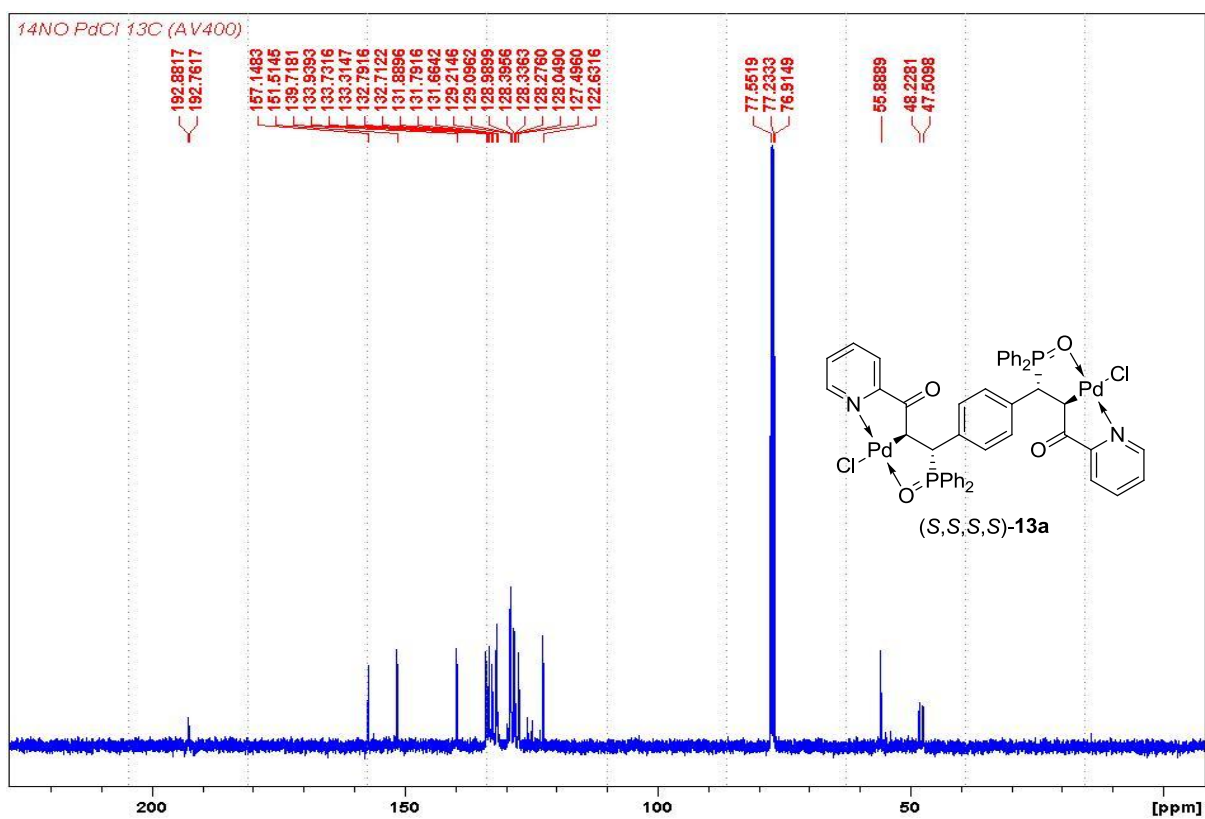

Figure s46.  $^{13}\text{C}$  NMR spectrum of complex (S,S,S,S)-13a.

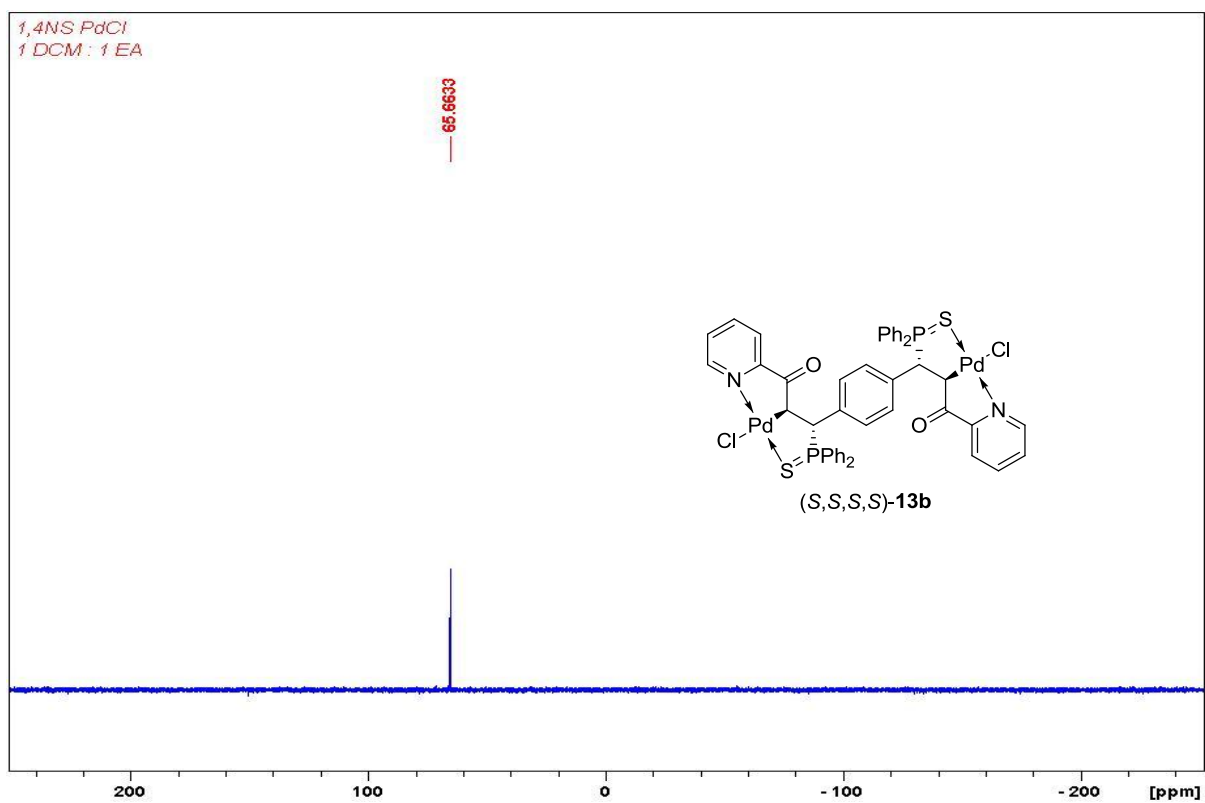

Figure s47.  $^{31}\text{P}\{^1\text{H}\}$  NMR spectrum of complex (S,S,S,S)-13b.

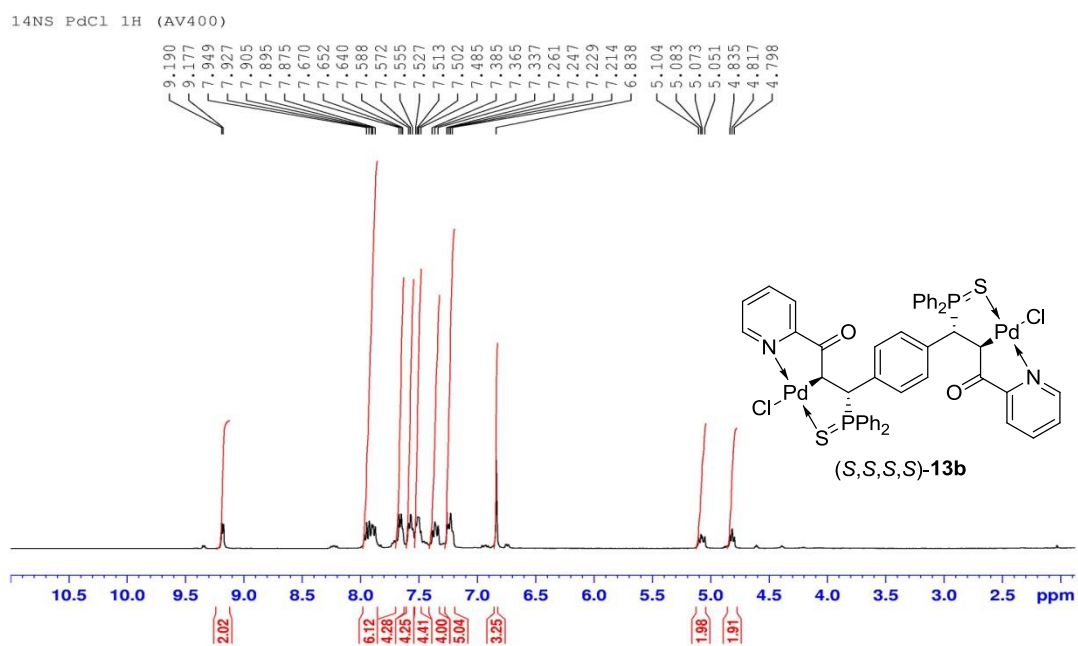

Figure s48.  $^1\text{H}$  NMR spectrum of complex **(S,S,S,S)-13b**.

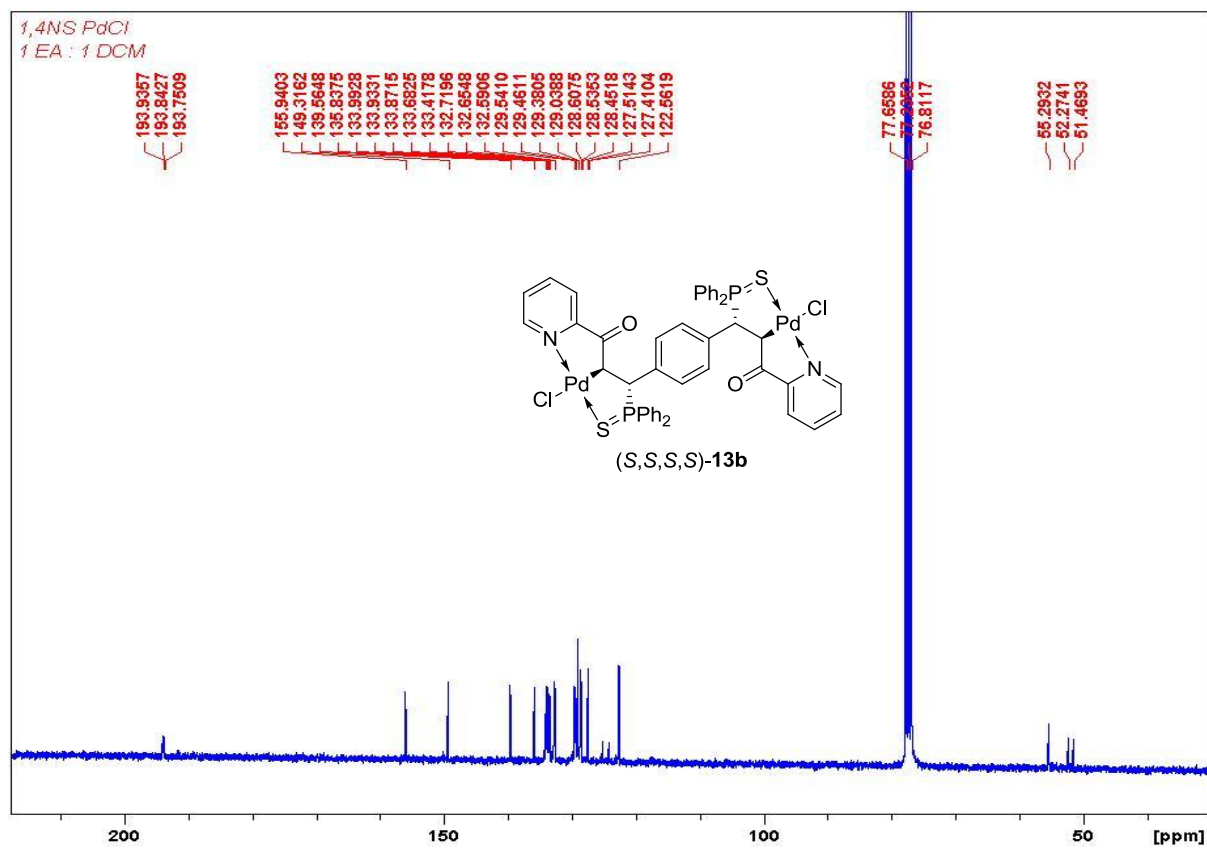

Figure s49.  $^{13}\text{C}$  NMR spectrum of complex **(S,S,S,S)-13b**.

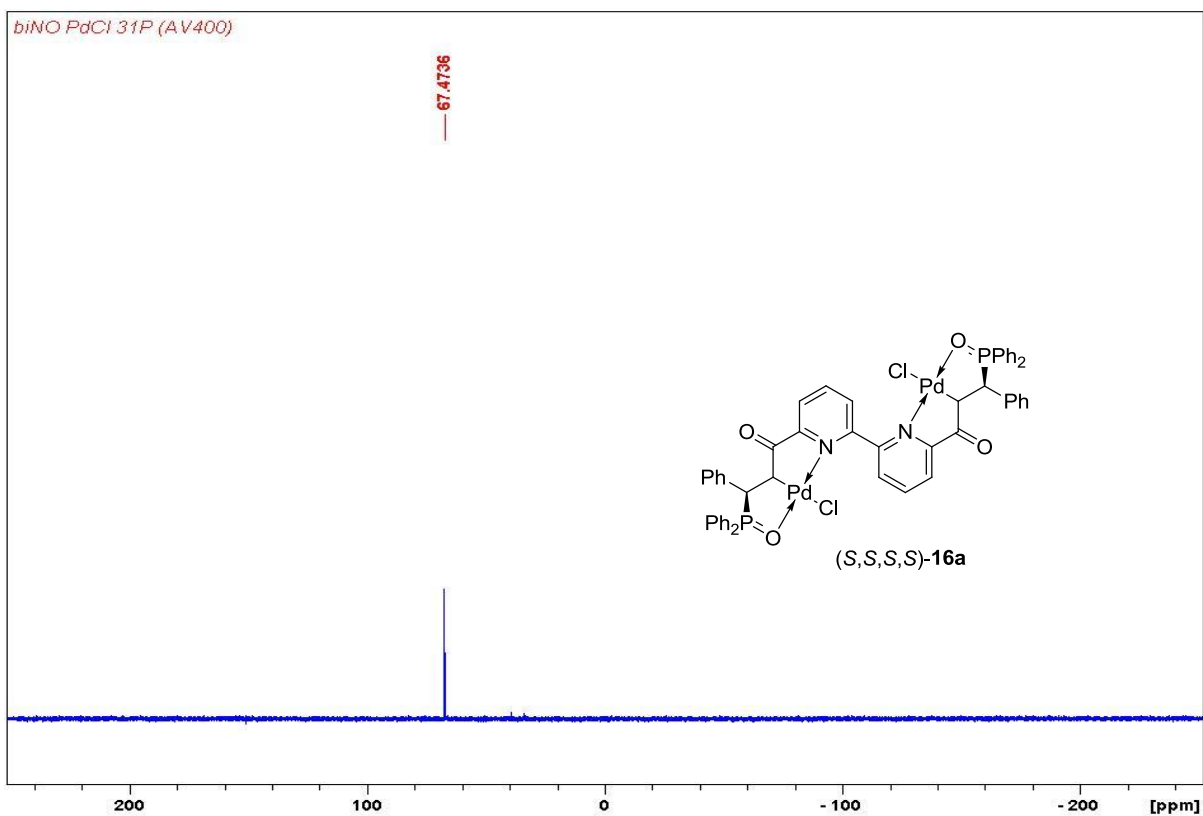

Figure s50.  $^{31}\text{P}\{^1\text{H}\}$  NMR spectrum of complex (S,S,S,S)-16a.

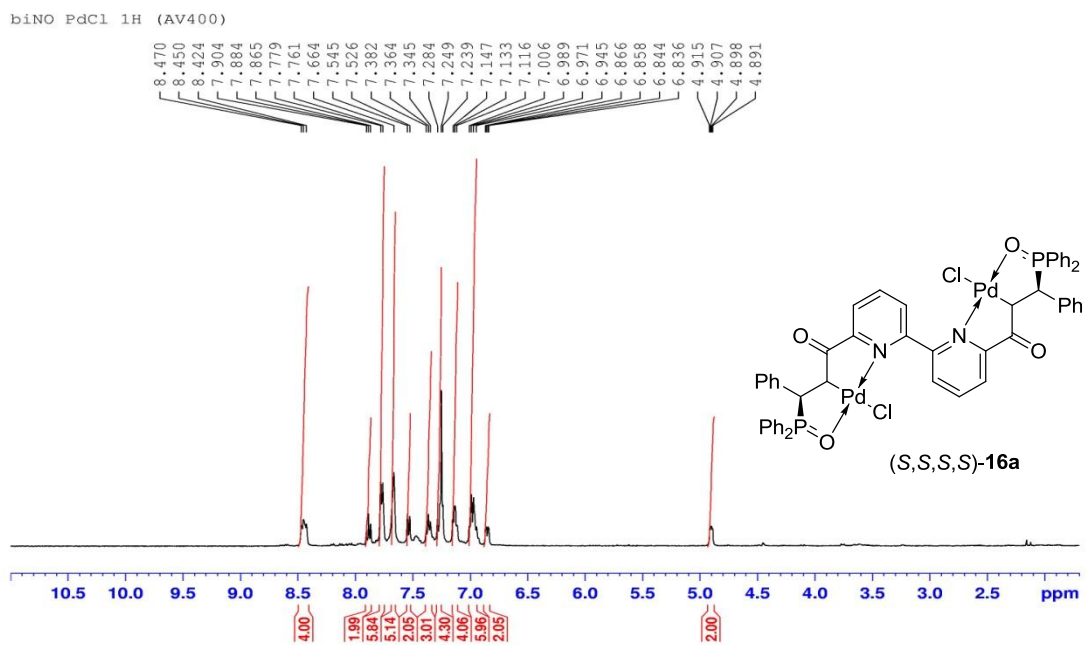

Figure s51.  $^1\text{H}$  NMR spectrum of complex (S,S,S,S)-16a.

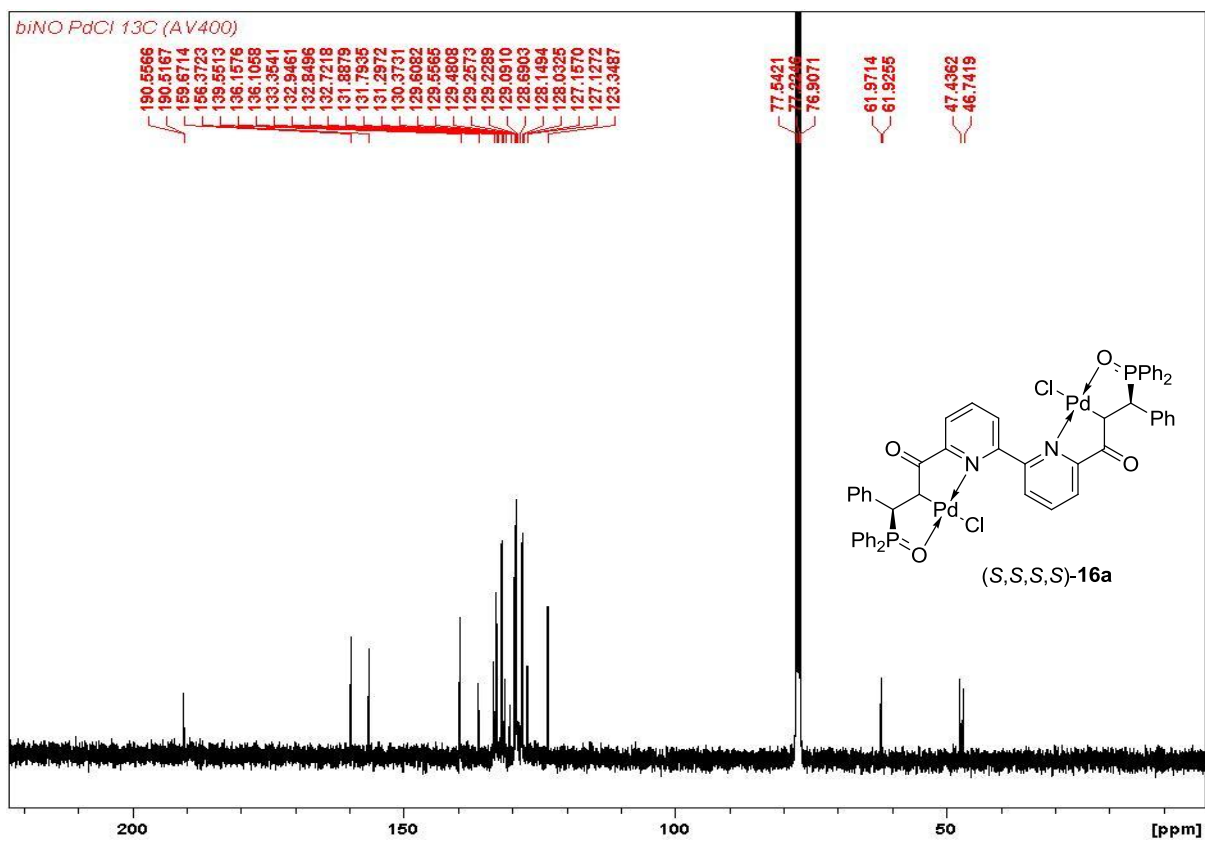

Figure s52.  $^{13}\text{C}$  NMR spectrum of complex  $(S,S,S,S)$ -16a.

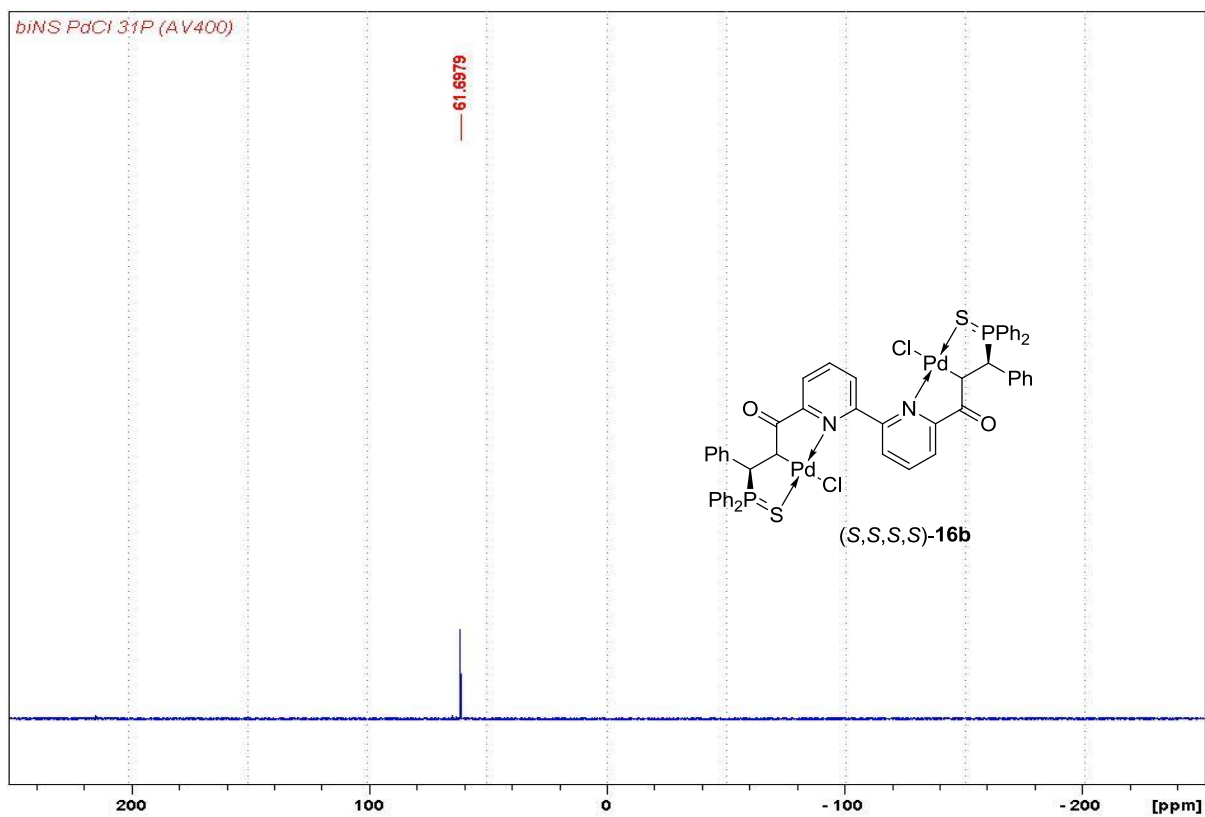

Figure s53.  $^{31}\text{P}\{^1\text{H}\}$  NMR spectrum of complex  $(S,S,S,S)$ -16b.

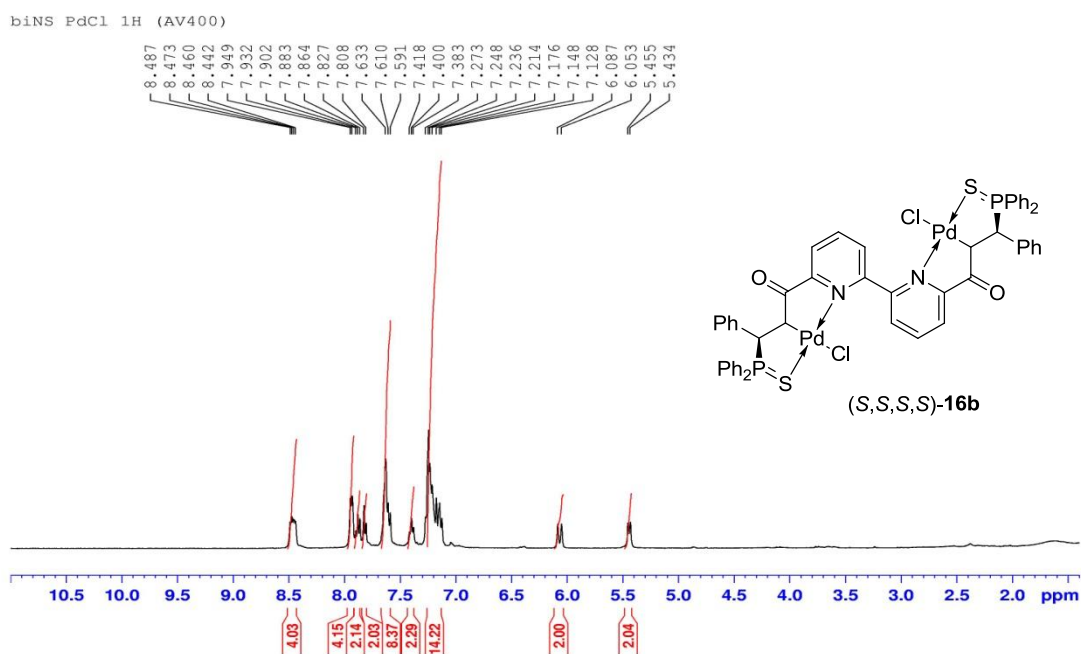

Figure s54.  $^1\text{H}$  NMR spectrum of complex  $(S,S,S,S)$ -16b.

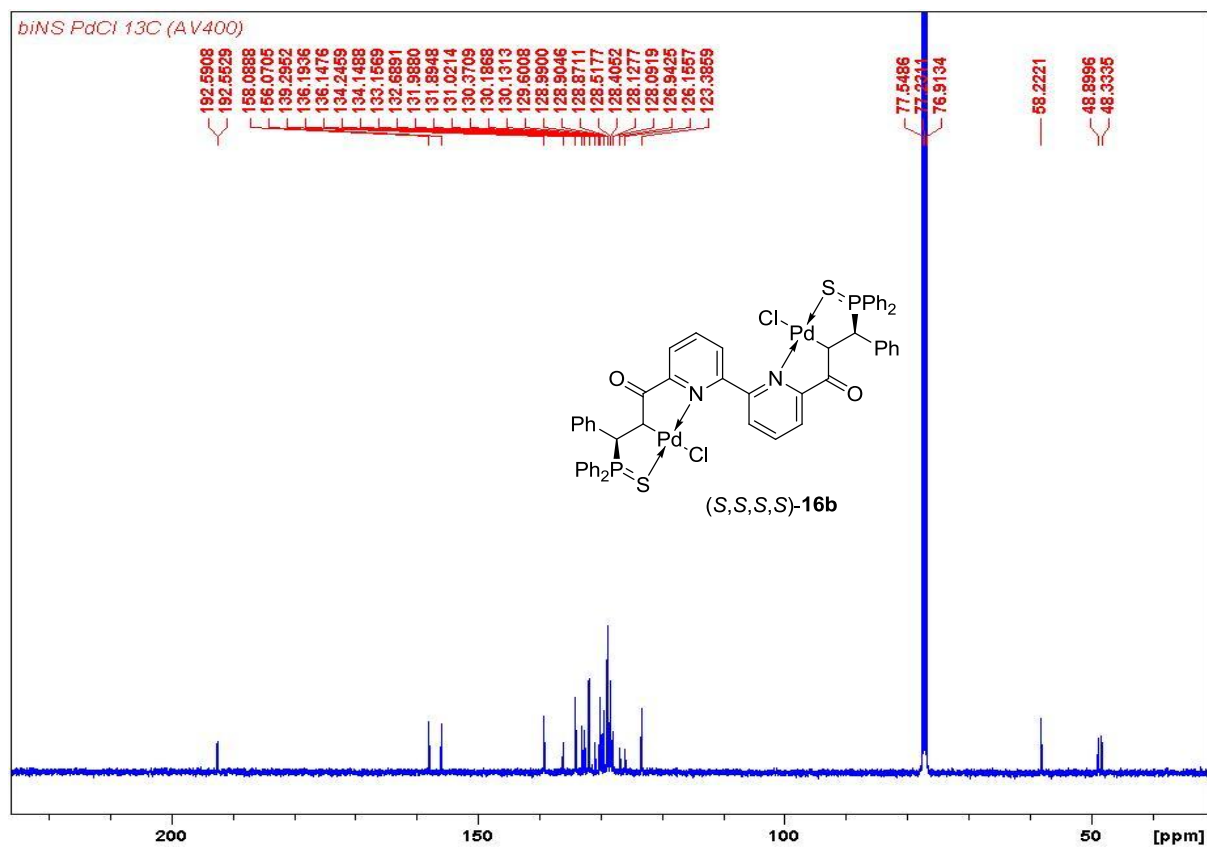

Figure s55.  $^{13}\text{C}$  NMR spectrum of complex  $(S,S,S,S)$ -16b.

## Determination of *ee*'s and *de*'s for bisphosphines **12** and **15**

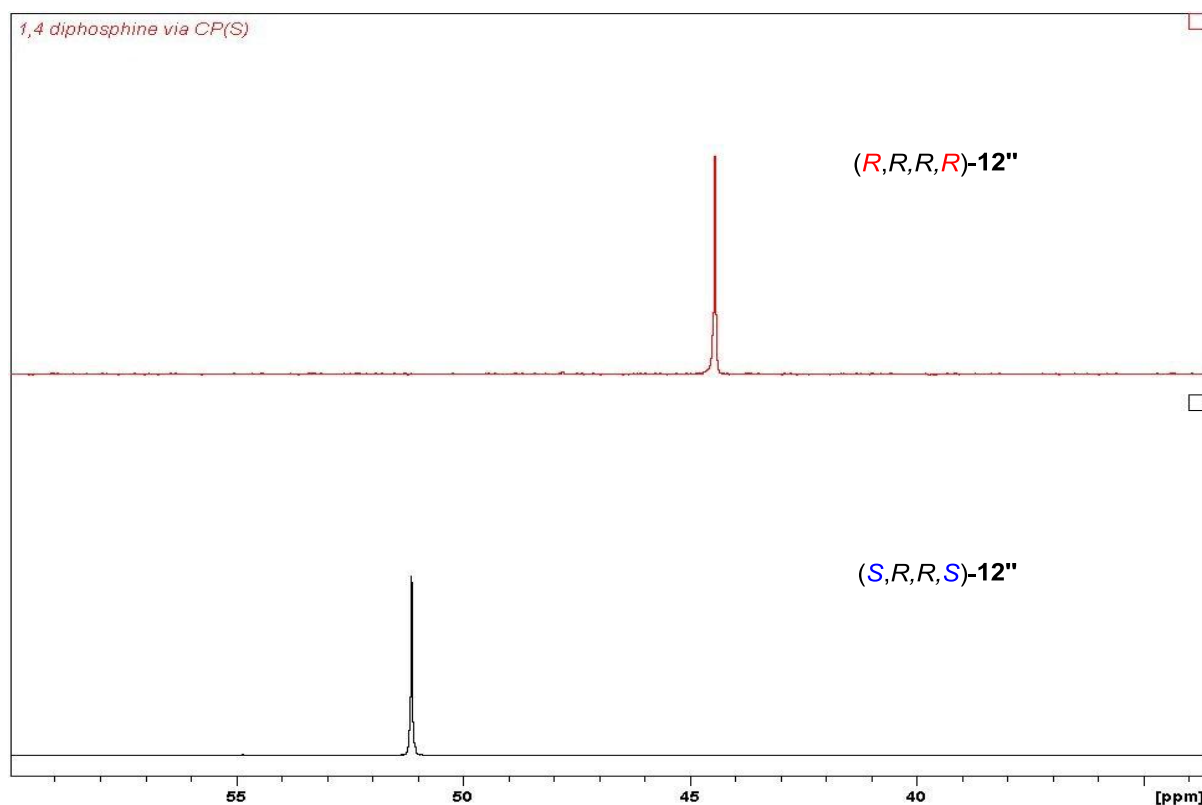

Figure s56. Determination of *ee* and *de* for bisphosphine **12''**.

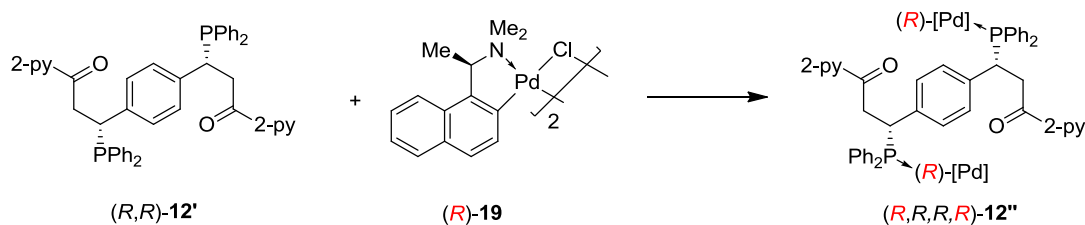

Scheme s2. Determination of *ee* and *de* for bisphosphine **12'**.

The determination of enantio- and diastereo-selectivity was conducted in a same manner as previously reported.<sup>1</sup> Theoretically, 3 isomers (*R,R*, *R,S/S,R* and *S,S*) may be formed *via* the double hydrophosphination reaction (in the case of a racemic mixture), and upon addition of a chiral derivatizing agent such as (*R*)-**19**, 3 phosphorous peaks corresponding to each diastereomers (*R,R,R,R*, *R,R,S,R/R,S,R,R*, and *R,S,S,R*) may be observed (in the case of a racemic mixture). A separate experiment involving the same crude reaction mixture but with the chiral derivatizing agent (*S*)-**19** serves as a confirmation of the results obtained. Since we only observed the appearance of one <sup>31</sup>P{<sup>1</sup>H} NMR signal in each experiment, this indicates that the *ee* and *de* of bisphosphine **12'** (obtained from the hydrophosphination reaction) are >99%.



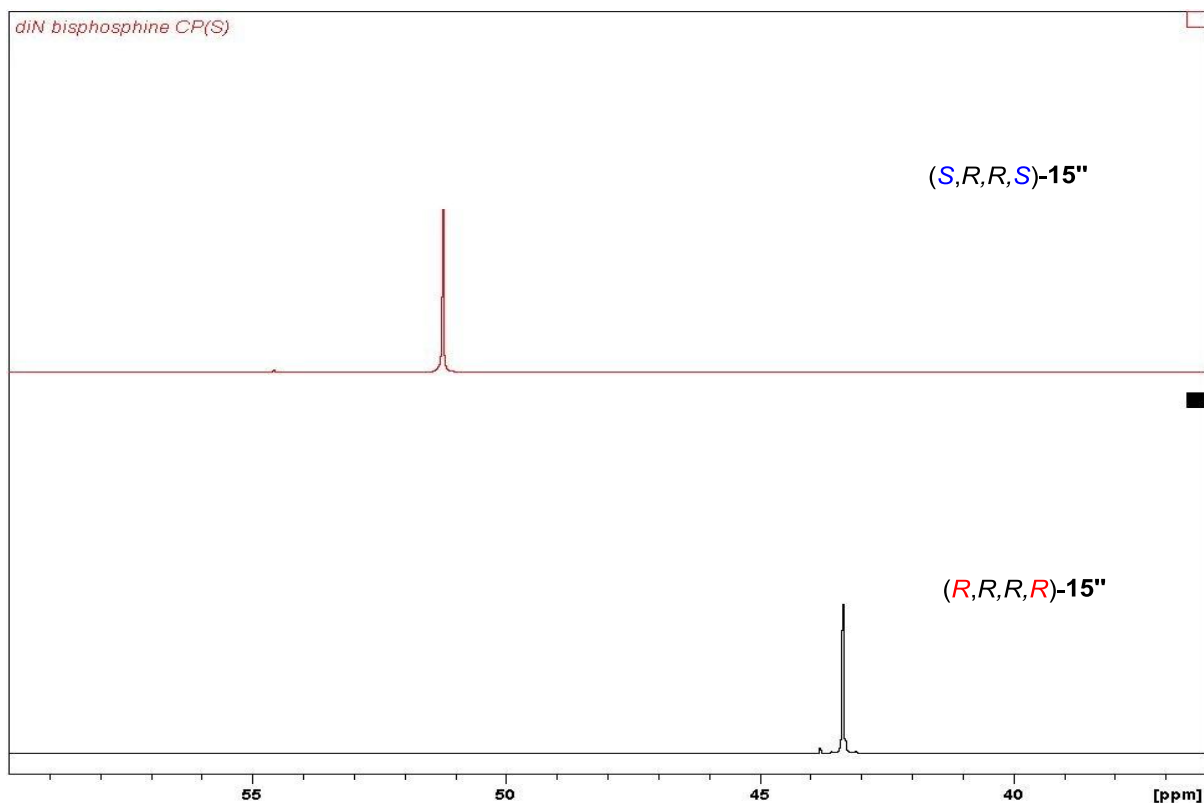

**Figure s57.** Determination of *ee* and *de* for bisphosphine **15'**.

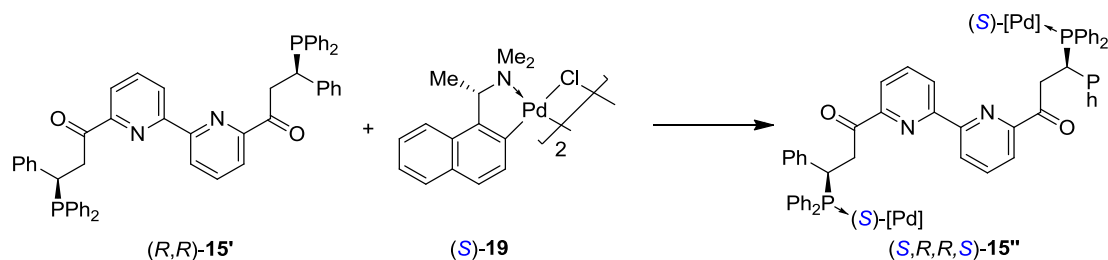

**Scheme s3.** Determination of *ee* and *de* for bisphosphine **15'**.

Similarly, employing the same technique as discussed above, 3 isomers (*R,R*, *R,S/S,R* and *S,S*) may be formed *via* the double hydrophosphination reaction (in the case of a racemic mixture). Upon addition of the chiral derivatizing agent (*S*)-**19**, 3 phosphorous peaks corresponding to each diastereomers (*S,R,R,S*, *S,R,S,S/S,S,R,S*, and *S,S,S,S*) may be observed (in the case of a racemic mixture). A separate experiment involving the same crude reaction mixture but with the chiral derivatizing agent (*R*)-**19** serves as a confirmation of the results obtained. Since we only observed the appearance of one  $^{31}\text{P}\{^1\text{H}\}$  NMR signal in each experiment, this indicates that the *ee* and *de* of bisphosphine **15'** (obtained from the hydrophosphination reaction) are >99%.

### Molecular Structures of NC(sp<sup>3</sup>)S Pincer Complexes **4b** and **9b**

The X-ray crystal structures of both complexes (*S,S*)-**4b** and (*S,S,S,S*)-**9b** exhibited distorted square planar geometries about the Pd centers. Similar to the monomeric species (*S,S*)-**4b**, the stereogenic tertiary carbon centers in all the dimeric complexes generated from the asymmetric hydrophosphination adopted the (*S*)-absolute configuration. Likewise, all the chiral palladium-bound carbon centers in the current series of aliphatic pincer complexes adopted the (*S*)-absolute configurations. The selected bond lengths and angles of complexes (*S,S*)-**4b** and (*S,S,S,S*)-**9b** are collated in Table s1. Similar Pd←N [**4b**: 2.052(4) Å, **9b**: 2.047(4) Å] and Pd←S bond lengths [**4b**: 2.298(1) Å, **9b**: 2.292(1) Å] were observed in both complexes. A slightly longer Pd-C bond was recorded for complex **9b** [2.061(4) Å] than complex **4b** [2.045(5) Å] likely due to steric interactions between the two adjacent –PPh<sub>2</sub> motifs in **9b**. We believe that a more meaningful comparison of bond lengths could only be achieved after more EC(sp<sup>3</sup>)E' Pd pincer complexes are reported in literature.

**Table s1.** Selected bond lengths (Å) and angles (°) of NC(sp<sup>3</sup>)S pincer complexes **4b** and **9b**.

|         | ( <i>S,S</i> )- <b>4b</b> | ( <i>S,S,S,S</i> )- <b>9b</b> |
|---------|---------------------------|-------------------------------|
| Pd←N    | 2.052(4)                  | 2.047(4)                      |
| Pd←S    | 2.298(1)                  | 2.292(1)                      |
| Pd–Cl   | 2.396(1)                  | 2.382(1)                      |
| Pd–C    | 2.045(5)                  | 2.061(4)                      |
| C–Pd←S  | 90.89(15)                 | 91.50(13)                     |
| C–Pd←N  | 82.21(19)                 | 81.50(17)                     |
| C–Pd–Cl | 174.72(15)                | 170.94(12)                    |
| Cl–Pd←S | 92.94(5)                  | 92.66(4)                      |
| Cl–Pd←N | 94.04(13)                 | 95.58(11)                     |
| N→Pd←S  | 172.93(13)                | 168.56(11)                    |

## HPLC Spectrum

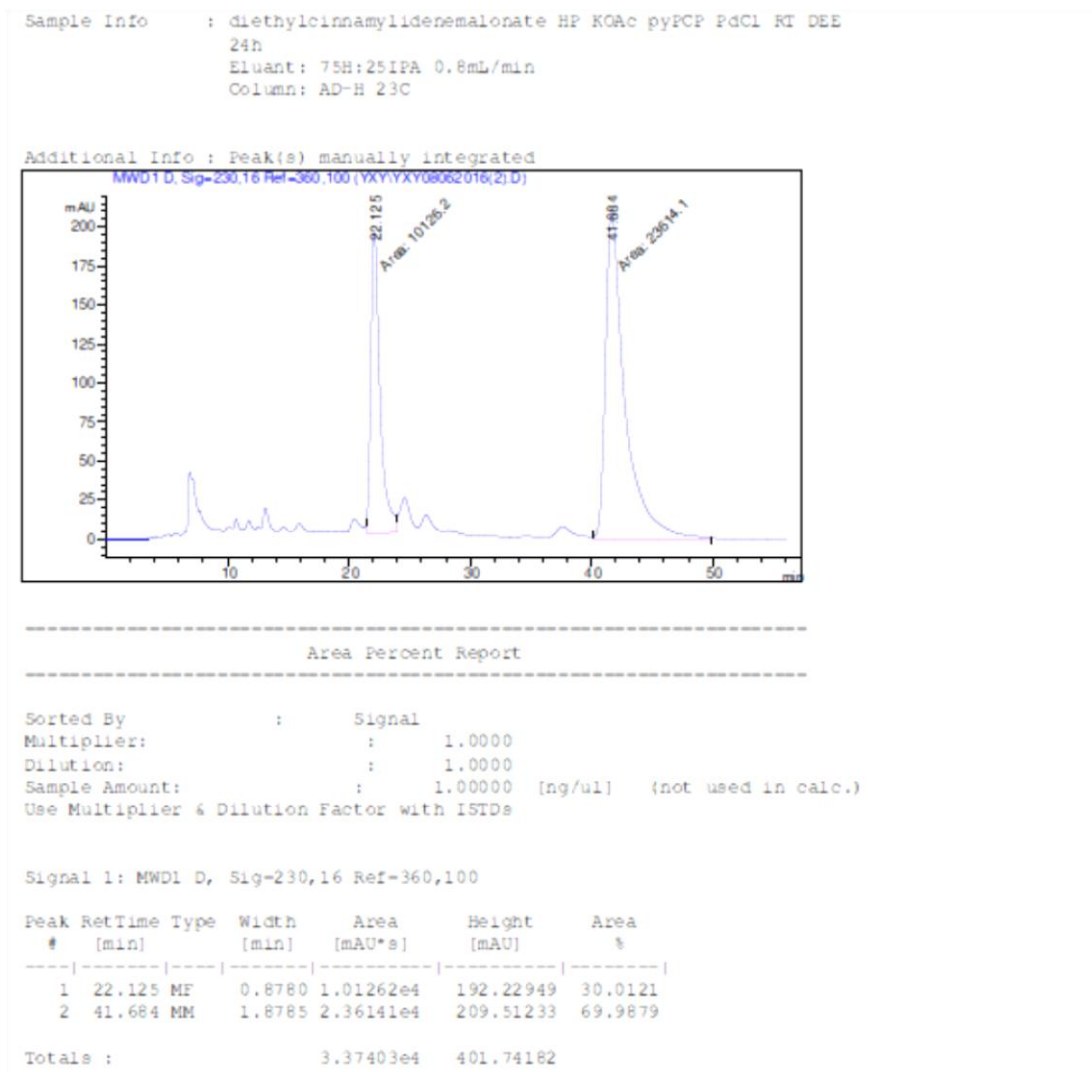

Figure s58. HPLC Spectrum of compound **18b** in Table 1 Entry 9.

The signals associated with compound **18b** was verified with the HPLC data obtained in an earlier report.<sup>6</sup>

## Crystallographic Data

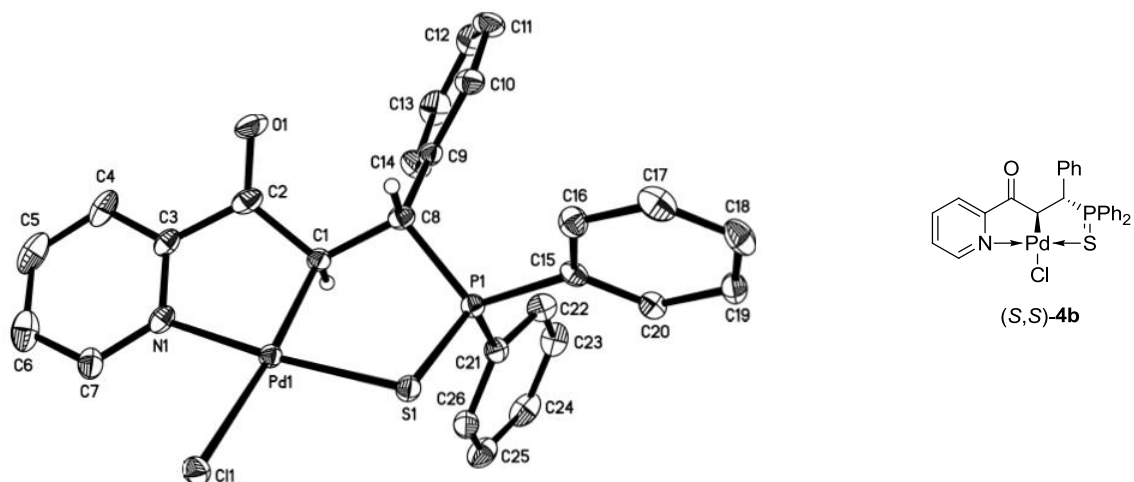

Figure s59. ORTEP of NCS Pd pincer complex (*S,S*)-**4b**.

Table s2. Data collection and structure refinement for complex (*S,S*)-**4b**.

|                                            |                                                        |                 |
|--------------------------------------------|--------------------------------------------------------|-----------------|
| <b>Chemical formula</b>                    | C <sub>27</sub> H <sub>23</sub> Cl <sub>3</sub> NOPPdS |                 |
| <b>Formula weight</b>                      | 653.24 g/mol                                           |                 |
| <b>Temperature</b>                         | 103(2) K                                               |                 |
| <b>Wavelength</b>                          | 0.71073 Å                                              |                 |
| <b>Crystal size</b>                        | 0.100 x 0.120 x 0.420 mm                               |                 |
| <b>Crystal habit</b>                       | yellow block                                           |                 |
| <b>Crystal system</b>                      | monoclinic                                             |                 |
| <b>Space group</b>                         | P 1 21 1                                               |                 |
| <b>Unit cell dimensions</b>                | a = 9.7127(5) Å                                        | α = 90°         |
|                                            | b = 11.5076(6) Å                                       | β = 105.963(4)° |
|                                            | c = 12.7323(6) Å                                       | γ = 90°         |
| <b>Volume</b>                              | 1368.21(12) Å <sup>3</sup>                             |                 |
| <b>Z</b>                                   | 2                                                      |                 |
| <b>Density (calculated)</b>                | 1.586 g/cm <sup>3</sup>                                |                 |
| <b>Absorption coefficient</b>              | 1.127 mm <sup>-1</sup>                                 |                 |
| <b>F(000)</b>                              | 656                                                    |                 |
| <b>Theta range for data collection</b>     | 3.44 to 35.13°                                         |                 |
| <b>Index ranges</b>                        | -15 ≤ h ≤ 15, -18 ≤ k ≤ 18, -19 ≤ l ≤ 20               |                 |
| <b>Reflections collected</b>               | 37087                                                  |                 |
| <b>Independent reflections</b>             | 12103 [R(int) = 0.0884]                                |                 |
| <b>Coverage of independent reflections</b> | 99.5%                                                  |                 |
| <b>Absorption correction</b>               | multi-scan                                             |                 |
| <b>Max. and min. transmission</b>          | 0.8960 and 0.6490                                      |                 |
| <b>Refinement method</b>                   | Full-matrix least-squares on F <sup>2</sup>            |                 |
| <b>Refinement program</b>                  | SHELXL-2014/6 (Sheldrick, 2014)                        |                 |

|                                            |                                                                                             |
|--------------------------------------------|---------------------------------------------------------------------------------------------|
| <b>Function minimized</b>                  | $\Sigma w(F_o^2 - F_c^2)^2$                                                                 |
| <b>Data / restraints / parameters</b>      | 12103 / 1 / 316                                                                             |
| <b>Goodness-of-fit on <math>F^2</math></b> | 0.988                                                                                       |
| $\Delta/\sigma_{\max}$                     | 0.001                                                                                       |
| <b>Final R indices</b>                     | 9028 data; $I > 2\sigma(I)$ R1 = 0.0543, wR2 = 0.0968<br>all data R1 = 0.0840, wR2 = 0.1103 |
| <b>Weighting scheme</b>                    | $w=1/[\sigma^2(F_o^2)+(0.0362P)^2]$<br>where $P=(F_o^2+2F_c^2)/3$                           |
| <b>Absolute structure parameter</b>        | 0.0(0)                                                                                      |
| <b>Largest diff. peak and hole</b>         | 0.960 and -1.311 eÅ <sup>-3</sup>                                                           |
| <b>R.M.S. deviation from mean</b>          | 0.154 eÅ <sup>-3</sup>                                                                      |

**Table s3.** Bond lengths (Å) for complex (S,S)-4b.

|         |            |         |            |         |            |
|---------|------------|---------|------------|---------|------------|
| Pd1-C1  | 2.045(5)   | Pd1-N1  | 2.052(4)   | C17-C18 | 1.388(9)   |
| Pd1-S1  | 2.2976(13) | Pd1-Cl1 | 2.3963(12) | C19-C20 | 1.388(7)   |
| C1-C2   | 1.499(8)   | C1-C8   | 1.540(7)   | C21-C22 | 1.404(8)   |
| C2-O1   | 1.219(7)   | C2-C3   | 1.487(8)   | C22-C23 | 1.385(8)   |
| C3-N1   | 1.348(7)   | C3-C4   | 1.382(8)   | C24-C25 | 1.377(9)   |
| C4-C5   | 1.381(10)  | C5-C6   | 1.387(9)   | C27-Cl3 | 1.762(7)   |
| C6-C7   | 1.383(8)   | C7-N1   | 1.338(7)   | P1-S1   | 2.0126(18) |
| C8-C9   | 1.513(7)   | C8-P1   | 1.823(5)   | C18-C19 | 1.385(8)   |
| C9-C14  | 1.383(7)   | C9-C10  | 1.401(8)   | C21-C26 | 1.382(8)   |
| C10-C11 | 1.392(7)   | C11-C12 | 1.361(9)   | C21-P1  | 1.808(6)   |
| C12-C13 | 1.390(10)  | C13-C14 | 1.388(8)   | C23-C24 | 1.392(9)   |
| C15-C20 | 1.394(7)   | C15-C16 | 1.403(7)   | C25-C26 | 1.398(8)   |
| C15-P1  | 1.800(5)   | C16-C17 | 1.383(7)   | C27-Cl2 | 1.764(7)   |

**Table s4.** Bond angles (°) for complex (S,S)-4b.

|             |            |             |            |             |            |
|-------------|------------|-------------|------------|-------------|------------|
| C1-Pd1-N1   | 82.21(19)  | C1-Pd1-S1   | 90.89(15)  | C22-C21-P1  | 120.3(4)   |
| N1-Pd1-S1   | 172.93(13) | C1-Pd1-Cl1  | 174.72(15) | C22-C23-C24 | 119.9(6)   |
| N1-Pd1-Cl1  | 94.04(13)  | S1-Pd1-Cl1  | 92.94(5)   | C24-C25-C26 | 119.6(6)   |
| C2-C1-C8    | 113.1(4)   | C2-C1-Pd1   | 101.4(3)   | Cl3-C27-Cl2 | 111.0(4)   |
| C8-C1-Pd1   | 118.0(3)   | O1-C2-C3    | 121.3(6)   | C7-N1-Pd1   | 127.0(4)   |
| O1-C2-C1    | 124.6(6)   | C3-C2-C1    | 113.9(5)   | C15-P1-C21  | 108.6(2)   |
| N1-C3-C4    | 122.5(6)   | N1-C3-C2    | 111.8(5)   | C21-P1-C8   | 108.5(2)   |
| C4-C3-C2    | 125.7(6)   | C5-C4-C3    | 117.9(6)   | C21-P1-S1   | 113.87(18) |
| C4-C5-C6    | 120.0(6)   | C7-C6-C5    | 118.9(6)   | P1-S1-Pd1   | 98.99(6)   |
| N1-C7-C6    | 121.4(5)   | C9-C8-C1    | 115.0(4)   | C23-C22-C21 | 119.4(6)   |
| C9-C8-P1    | 117.3(4)   | C1-C8-P1    | 104.0(3)   | C25-C24-C23 | 120.9(6)   |
| C14-C9-C10  | 118.6(5)   | C14-C9-C8   | 122.4(5)   | C21-C26-C25 | 120.0(5)   |
| C10-C9-C8   | 118.9(5)   | C11-C10-C9  | 119.9(5)   | C7-N1-C3    | 119.4(5)   |
| C12-C11-C10 | 120.8(6)   | C11-C12-C13 | 120.0(5)   | C3-N1-Pd1   | 113.5(4)   |
| C14-C13-C12 | 119.6(6)   | C9-C14-C13  | 121.0(6)   | C15-P1-C8   | 112.7(2)   |
| C20-C15-C16 | 119.9(5)   | C20-C15-P1  | 121.5(4)   | C15-P1-S1   | 107.90(17) |
| C16-C15-P1  | 118.1(4)   | C17-C16-C15 | 119.5(6)   | C8-P1-S1    | 105.33(18) |
| C16-C17-C18 | 120.4(6)   | C19-C18-C17 | 120.3(5)   | C26-C21-C22 | 120.2(5)   |
| C18-C19-C20 | 119.9(6)   | C19-C20-C15 | 120.0(5)   | C26-C21-P1  | 119.5(4)   |

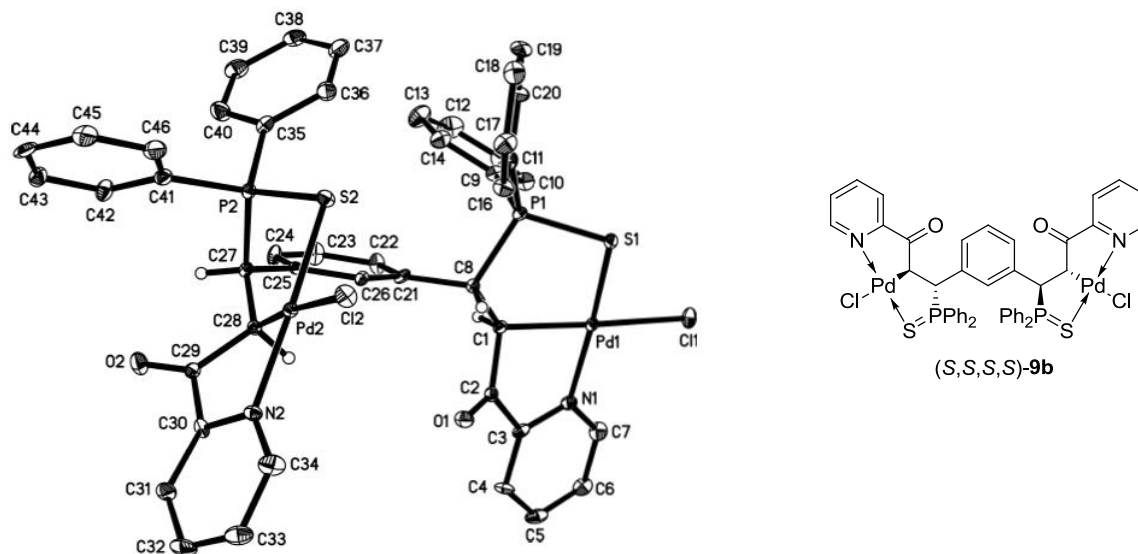

Figure s60. ORTEP of NCS Pd pincer complex (*S,S,S,S*)-**9b**.

Table s5. Data collection and structure refinement for complex (*S,S,S,S*)-**9b**.

|                                            |                                                                                                                             |                   |
|--------------------------------------------|-----------------------------------------------------------------------------------------------------------------------------|-------------------|
| <b>Chemical formula</b>                    | C <sub>49</sub> H <sub>42</sub> Cl <sub>8</sub> N <sub>2</sub> O <sub>2</sub> P <sub>2</sub> Pd <sub>2</sub> S <sub>2</sub> |                   |
| <b>Formula weight</b>                      | 1313.30 g/mol                                                                                                               |                   |
| <b>Temperature</b>                         | 103(2) K                                                                                                                    |                   |
| <b>Wavelength</b>                          | 0.71073 Å                                                                                                                   |                   |
| <b>Crystal size</b>                        | 0.120 x 0.300 x 0.420 mm                                                                                                    |                   |
| <b>Crystal habit</b>                       | yellow block                                                                                                                |                   |
| <b>Crystal system</b>                      | monoclinic                                                                                                                  |                   |
| <b>Space group</b>                         | P 1 21 1                                                                                                                    |                   |
| <b>Unit cell dimensions</b>                | a = 9.4797(8) Å                                                                                                             | α = 90°           |
|                                            | b = 28.175(2) Å                                                                                                             | β = 104.9626(15)° |
|                                            | c = 10.1153(9) Å                                                                                                            | γ = 90°           |
| <b>Volume</b>                              | 2610.1(4) Å <sup>3</sup>                                                                                                    |                   |
| <b>Z</b>                                   | 2                                                                                                                           |                   |
| <b>Density (calculated)</b>                | 1.671 g/cm <sup>3</sup>                                                                                                     |                   |
| <b>Absorption coefficient</b>              | 1.281 mm <sup>-1</sup>                                                                                                      |                   |
| <b>F(000)</b>                              | 1312                                                                                                                        |                   |
| <b>Theta range for data collection</b>     | 2.08 to 31.07°                                                                                                              |                   |
| <b>Index ranges</b>                        | -13 ≤ h ≤ 11, -40 ≤ k ≤ 40, -14 ≤ l ≤ 14                                                                                    |                   |
| <b>Reflections collected</b>               | 25467                                                                                                                       |                   |
| <b>Independent reflections</b>             | 15305 [R(int) = 0.0343]                                                                                                     |                   |
| <b>Coverage of independent reflections</b> | 97.2%                                                                                                                       |                   |
| <b>Absorption correction</b>               | multi-scan                                                                                                                  |                   |
| <b>Max. and min. transmission</b>          | 0.8610 and 0.6150                                                                                                           |                   |
| <b>Refinement method</b>                   | Full-matrix least-squares on F <sup>2</sup>                                                                                 |                   |
| <b>Refinement program</b>                  | SHELXL-2014/6 (Sheldrick, 2014)                                                                                             |                   |
| <b>Function minimized</b>                  | Σ w(F <sub>o</sub> <sup>2</sup> - F <sub>c</sub> <sup>2</sup> ) <sup>2</sup>                                                |                   |

|                                         |                                                                                                                         |                           |
|-----------------------------------------|-------------------------------------------------------------------------------------------------------------------------|---------------------------|
| <b>Data / restraints / parameters</b>   | 15305 / 1 / 604                                                                                                         |                           |
| <b>Goodness-of-fit on F<sup>2</sup></b> | 1.043                                                                                                                   |                           |
| $\Delta/\sigma_{\max}$                  | 0.001                                                                                                                   |                           |
| <b>Final R indices</b>                  | 14485 data; I>2 $\sigma$ (I)                                                                                            | R1 = 0.0359, wR2 = 0.0770 |
|                                         | all data                                                                                                                | R1 = 0.0386, wR2 = 0.0784 |
| <b>Weighting scheme</b>                 | w=1/[ $\sigma^2(F_o^2)+(0.0246P)^2+0.7498P$ ]<br>where P=(F <sub>o</sub> <sup>2</sup> +2F <sub>c</sub> <sup>2</sup> )/3 |                           |
| <b>Absolute structure parameter</b>     | -0.031(12)                                                                                                              |                           |
| <b>Largest diff. peak and hole</b>      | 0.970 and -0.711 eÅ <sup>-3</sup>                                                                                       |                           |
| <b>R.M.S. deviation from mean</b>       | 0.107 eÅ <sup>-3</sup>                                                                                                  |                           |

**Table s6.** Bond lengths (Å) for complex (S,S,S,S)-9b.

|         |            |         |            |         |            |
|---------|------------|---------|------------|---------|------------|
| Pd1-N1  | 2.047(4)   | Pd1-C1  | 2.061(4)   | C29-O2  | 1.214(5)   |
| Pd1-S1  | 2.2919(12) | Pd1-C11 | 2.3821(11) | C30-N2  | 1.348(6)   |
| Pd2-N2  | 2.054(4)   | Pd2-C28 | 2.059(4)   | C31-C32 | 1.384(7)   |
| Pd2-S2  | 2.2937(13) | Pd2-C12 | 2.3750(11) | C33-C34 | 1.375(7)   |
| C1-C2   | 1.474(7)   | C1-C8   | 1.524(6)   | C35-C40 | 1.395(6)   |
| C2-O1   | 1.213(5)   | C2-C3   | 1.510(6)   | C35-P2  | 1.803(5)   |
| C3-N1   | 1.352(6)   | C3-C4   | 1.389(6)   | C37-C38 | 1.391(7)   |
| C4-C5   | 1.382(7)   | C5-C6   | 1.387(8)   | C39-C40 | 1.390(7)   |
| C6-C7   | 1.387(8)   | C7-N1   | 1.349(6)   | C41-C42 | 1.403(6)   |
| C8-C21  | 1.520(6)   | C8-P1   | 1.827(5)   | C42-C43 | 1.383(6)   |
| C9-C14  | 1.396(6)   | C9-C10  | 1.407(6)   | C44-C45 | 1.386(8)   |
| C9-P1   | 1.797(5)   | C10-C11 | 1.377(7)   | C47-C13 | 1.769(5)   |
| C11-C12 | 1.389(8)   | C12-C13 | 1.379(8)   | C29-C30 | 1.522(6)   |
| C13-C14 | 1.392(7)   | C15-C16 | 1.392(6)   | C30-C31 | 1.368(7)   |
| C15-C20 | 1.395(7)   | C15-P1  | 1.805(5)   | C32-C33 | 1.396(8)   |
| C16-C17 | 1.403(7)   | C17-C18 | 1.377(8)   | C34-N2  | 1.336(6)   |
| C18-C19 | 1.398(7)   | C19-C20 | 1.398(7)   | C35-C36 | 1.405(7)   |
| C21-C26 | 1.398(6)   | C21-C22 | 1.401(6)   | C36-C37 | 1.372(7)   |
| C22-C23 | 1.385(6)   | C23-C24 | 1.398(6)   | C38-C39 | 1.386(8)   |
| C24-C25 | 1.399(6)   | C25-C26 | 1.400(6)   | C41-C46 | 1.397(6)   |
| C25-C27 | 1.512(6)   | C27-C28 | 1.548(6)   | C41-P2  | 1.807(4)   |
| C27-P2  | 1.822(5)   | C28-C29 | 1.478(6)   | C43-C44 | 1.389(7)   |
| C45-C46 | 1.385(7)   | C47-C14 | 1.769(5)   | P1-S1   | 2.0138(15) |
| C48-C16 | 1.768(6)   | C48-C15 | 1.773(6)   | P2-S2   | 2.0071(15) |
| C49-C17 | 1.752(6)   | C49-C18 | 1.763(7)   |         |            |

**Table s7.** Bond angles (°) for complex (S,S,S,S)-9b.

|             |            |            |            |             |          |
|-------------|------------|------------|------------|-------------|----------|
| N1-Pd1-C1   | 81.50(17)  | N1-Pd1-S1  | 168.56(11) | C36-C35-P2  | 120.2(3) |
| C1-Pd1-S1   | 91.50(13)  | N1-Pd1-C11 | 95.58(11)  | C36-C37-C38 | 120.6(5) |
| C1-Pd1-C11  | 170.94(12) | S1-Pd1-C11 | 92.66(4)   | C38-C39-C40 | 120.2(5) |
| N2-Pd2-C28  | 80.83(17)  | N2-Pd2-S2  | 172.44(11) | C46-C41-C42 | 118.8(4) |
| C28-Pd2-S2  | 91.61(13)  | N2-Pd2-C12 | 97.03(11)  | C42-C41-P2  | 121.0(3) |
| C28-Pd2-C12 | 174.45(12) | S2-Pd2-C12 | 90.52(4)   | C42-C43-C44 | 120.6(5) |
| C2-C1-C8    | 113.9(4)   | C2-C1-Pd1  | 101.1(3)   | C46-C45-C44 | 120.3(5) |

|             |          |             |          |             |            |
|-------------|----------|-------------|----------|-------------|------------|
| C8-C1-Pd1   | 120.9(3) | O1-C2-C1    | 125.8(4) | C13-C47-C14 | 111.1(3)   |
| O1-C2-C3    | 121.3(4) | C1-C2-C3    | 112.8(4) | C17-C49-C18 | 112.0(3)   |
| N1-C3-C4    | 122.6(4) | N1-C3-C2    | 112.9(4) | C7-N1-Pd1   | 128.7(3)   |
| C4-C3-C2    | 124.4(4) | C5-C4-C3    | 119.1(5) | C34-N2-C30  | 118.7(4)   |
| C4-C5-C6    | 118.1(5) | C7-C6-C5    | 120.6(4) | C30-N2-Pd2  | 113.1(3)   |
| N1-C7-C6    | 121.0(5) | C21-C8-C1   | 114.7(4) | C9-P1-C8    | 107.9(2)   |
| C21-C8-P1   | 115.0(3) | C1-C8-P1    | 105.3(3) | C9-P1-S1    | 113.43(16) |
| C14-C9-C10  | 120.0(4) | C14-C9-P1   | 119.3(3) | C8-P1-S1    | 106.20(14) |
| C10-C9-P1   | 120.4(3) | C11-C10-C9  | 119.2(4) | C35-P2-C27  | 109.2(2)   |
| C10-C11-C12 | 120.9(5) | C13-C12-C11 | 119.9(5) | C35-P2-S2   | 110.47(17) |
| C12-C13-C14 | 120.4(5) | C13-C14-C9  | 119.5(5) | C27-P2-S2   | 107.75(14) |
| C16-C15-C20 | 120.5(4) | C16-C15-P1  | 119.4(4) | C37-C36-C35 | 120.0(5)   |
| C20-C15-P1  | 119.4(3) | C15-C16-C17 | 118.8(5) | C39-C38-C37 | 119.8(5)   |
| C18-C17-C16 | 120.9(5) | C17-C18-C19 | 120.4(5) | C39-C40-C35 | 120.0(5)   |
| C18-C19-C20 | 119.3(5) | C15-C20-C19 | 120.1(5) | C46-C41-P2  | 120.2(4)   |
| C26-C21-C22 | 119.1(4) | C26-C21-C8  | 120.5(4) | C43-C42-C41 | 120.1(4)   |
| C22-C21-C8  | 120.4(4) | C23-C22-C21 | 120.8(4) | C45-C44-C43 | 119.6(4)   |
| C22-C23-C24 | 119.6(4) | C23-C24-C25 | 120.9(4) | C45-C46-C41 | 120.5(5)   |
| C24-C25-C26 | 118.7(4) | C24-C25-C27 | 119.1(4) | C16-C48-C15 | 111.5(3)   |
| C26-C25-C27 | 122.2(4) | C21-C26-C25 | 121.0(4) | C7-N1-C3    | 118.5(4)   |
| C25-C27-C28 | 115.2(3) | C25-C27-P2  | 111.2(3) | C3-N1-Pd1   | 111.8(3)   |
| C28-C27-P2  | 105.5(3) | C29-C28-C27 | 115.1(3) | C34-N2-Pd2  | 128.1(3)   |
| C29-C28-Pd2 | 103.2(3) | C27-C28-Pd2 | 120.6(3) | C9-P1-C15   | 108.5(2)   |
| O2-C29-C28  | 126.4(4) | O2-C29-C30  | 121.2(4) | C15-P1-C8   | 112.4(2)   |
| C28-C29-C30 | 112.4(4) | N2-C30-C31  | 122.8(4) | C15-P1-S1   | 108.52(15) |
| N2-C30-C29  | 112.8(4) | C31-C30-C29 | 124.3(4) | C35-P2-C41  | 108.7(2)   |
| C30-C31-C32 | 118.9(5) | C31-C32-C33 | 118.3(5) | C41-P2-C27  | 108.1(2)   |
| C34-C33-C32 | 119.5(5) | N2-C34-C33  | 121.8(5) | C41-P2-S2   | 112.51(15) |
| C40-C35-C36 | 119.4(4) | C40-C35-P2  | 120.2(4) | P1-S1-Pd1   | 96.75(6)   |
| P2-S2-Pd2   | 92.61(6) |             |          |             |            |
